# Supplementary material for: Comparing Remote Sensing and Geostatistical Techniques in Filling Gaps in Rain Gauge Records and Generating Multi-Return Period Isohyetal Maps in Arid Regions—Case Study: Kingdom of Saudi Arabia
Source: MDPI journal article supplement (doi:10.3390/w16070925), 2024-03-22

Article

# Comparing Remote Sensing and Geostatistical Techniques in Filling Gaps in Rain Gauge Records and Generating Multi-Return Period Isohyetal Maps in Arid Regions—Case Study: Kingdom of Saudi Arabia

Ahmed M. Helmi <sup>1,\*</sup>, Mohamed I. Farouk <sup>2,3</sup>, Raouf Hassan <sup>2,4</sup>, Mohd Aamir Mumtaz <sup>2</sup>, Lotfi Chaouachi <sup>2</sup> and Mohamed H. Elgamal <sup>2</sup>

<sup>1</sup> Irrigation and Hydraulics Department, Faculty of Engineering, Cairo University, Giza 12613, Egypt

<sup>2</sup> Civil Engineering Department, College of Engineering, Imam Mohammad Ibn Saud Islamic University (IMSIU), Riyadh 13318, Saudi Arabia; miradi@imamu.edu.sa (M.I.F.); rahassan@imamu.edu.sa (R.H.); mmaamir@imamu.edu.sa (M.A.M.); lotfich64@gmail.com (L.C.); mhelgamal@imamu.edu.sa (M.H.E.)

<sup>3</sup> Irrigation and Hydraulics Department, Faculty of Engineering, Ain Shams University, Cairo 11517, Egypt

<sup>4</sup> Civil Engineering Department, Faculty of Engineering, Aswan University, Aswan 81542, Egypt

\* Correspondence: ahmed.helmi@eng.cu.edu.eg

## Supplementary Materials

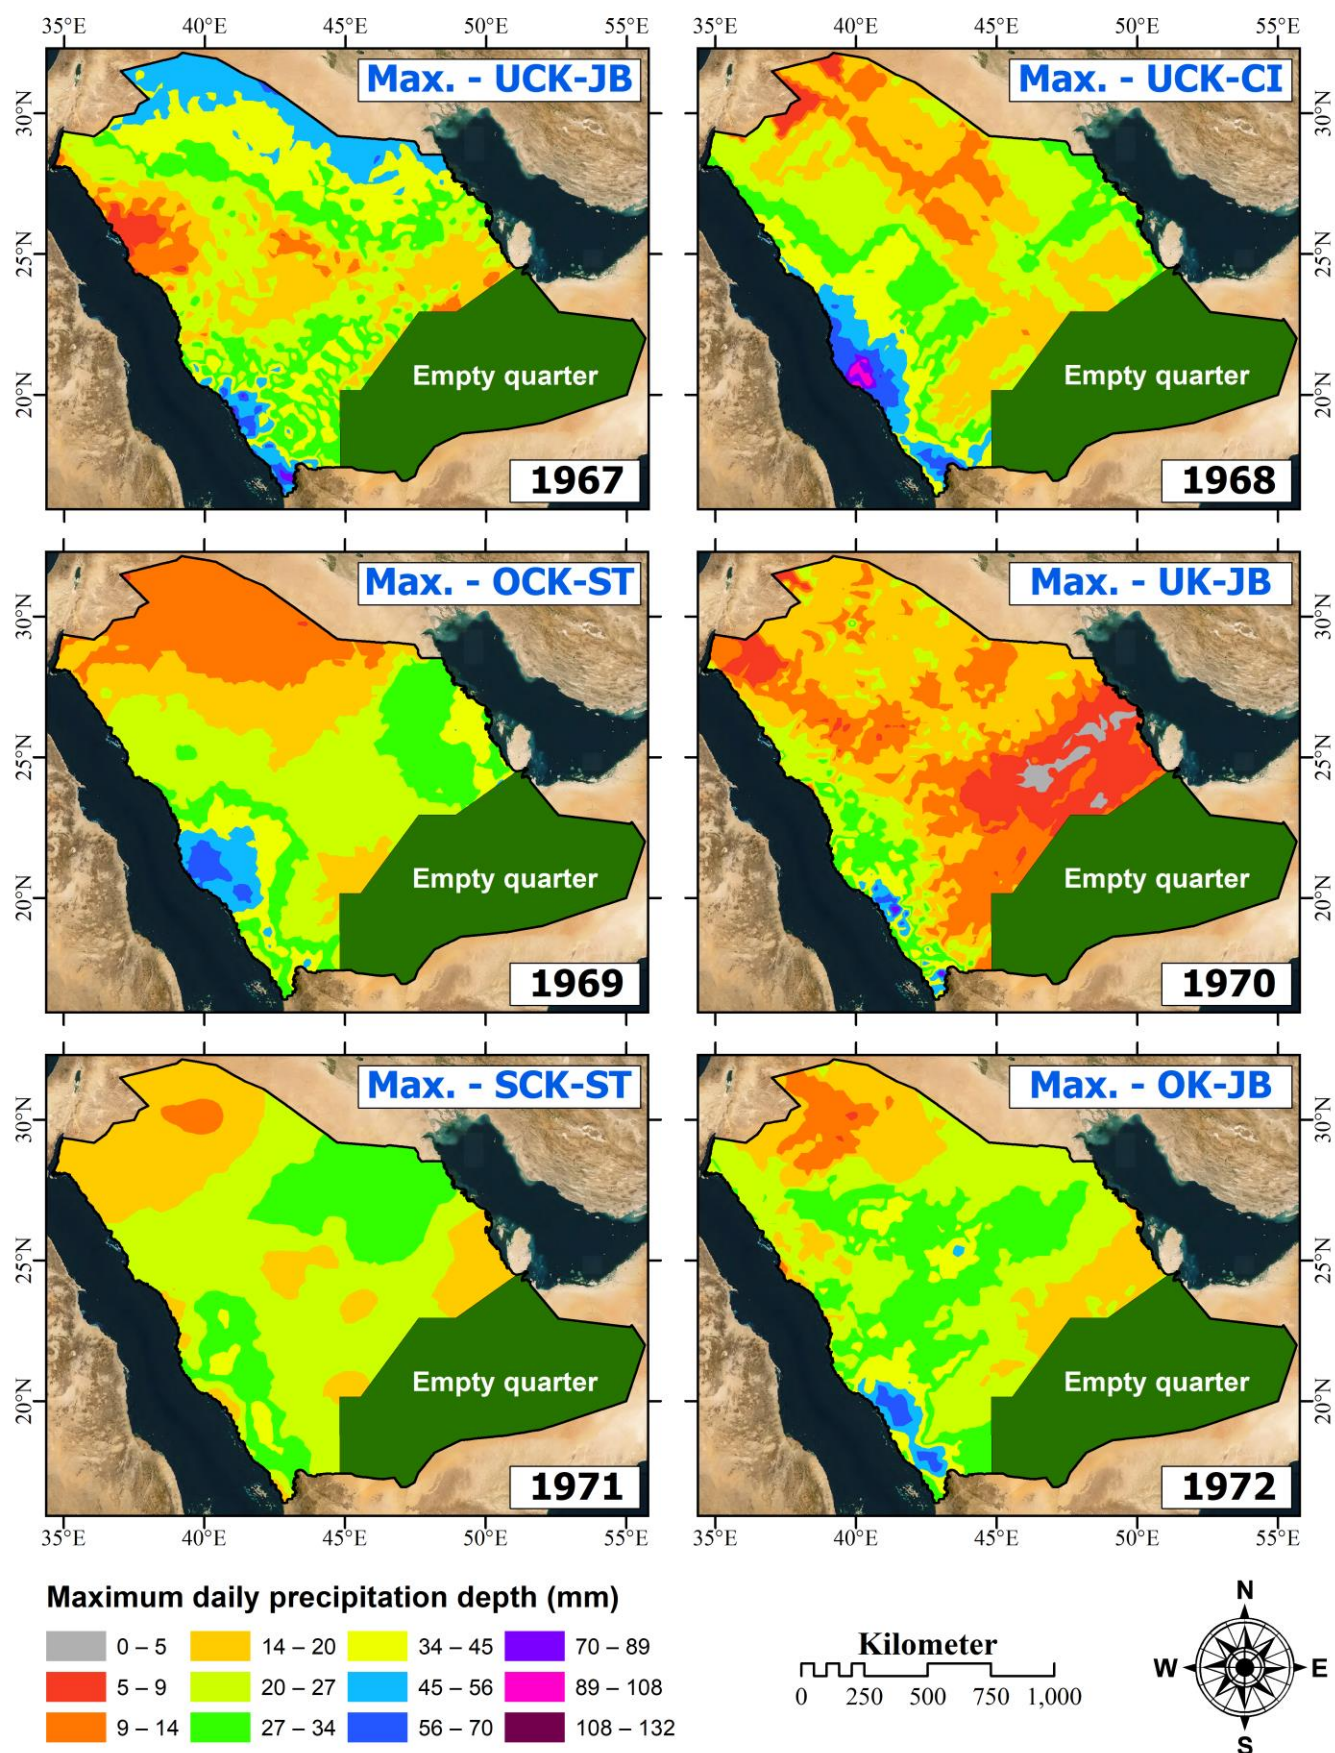

Figure S1. Spatial distribution o maximum daily precipitation depth from (1967-1972).



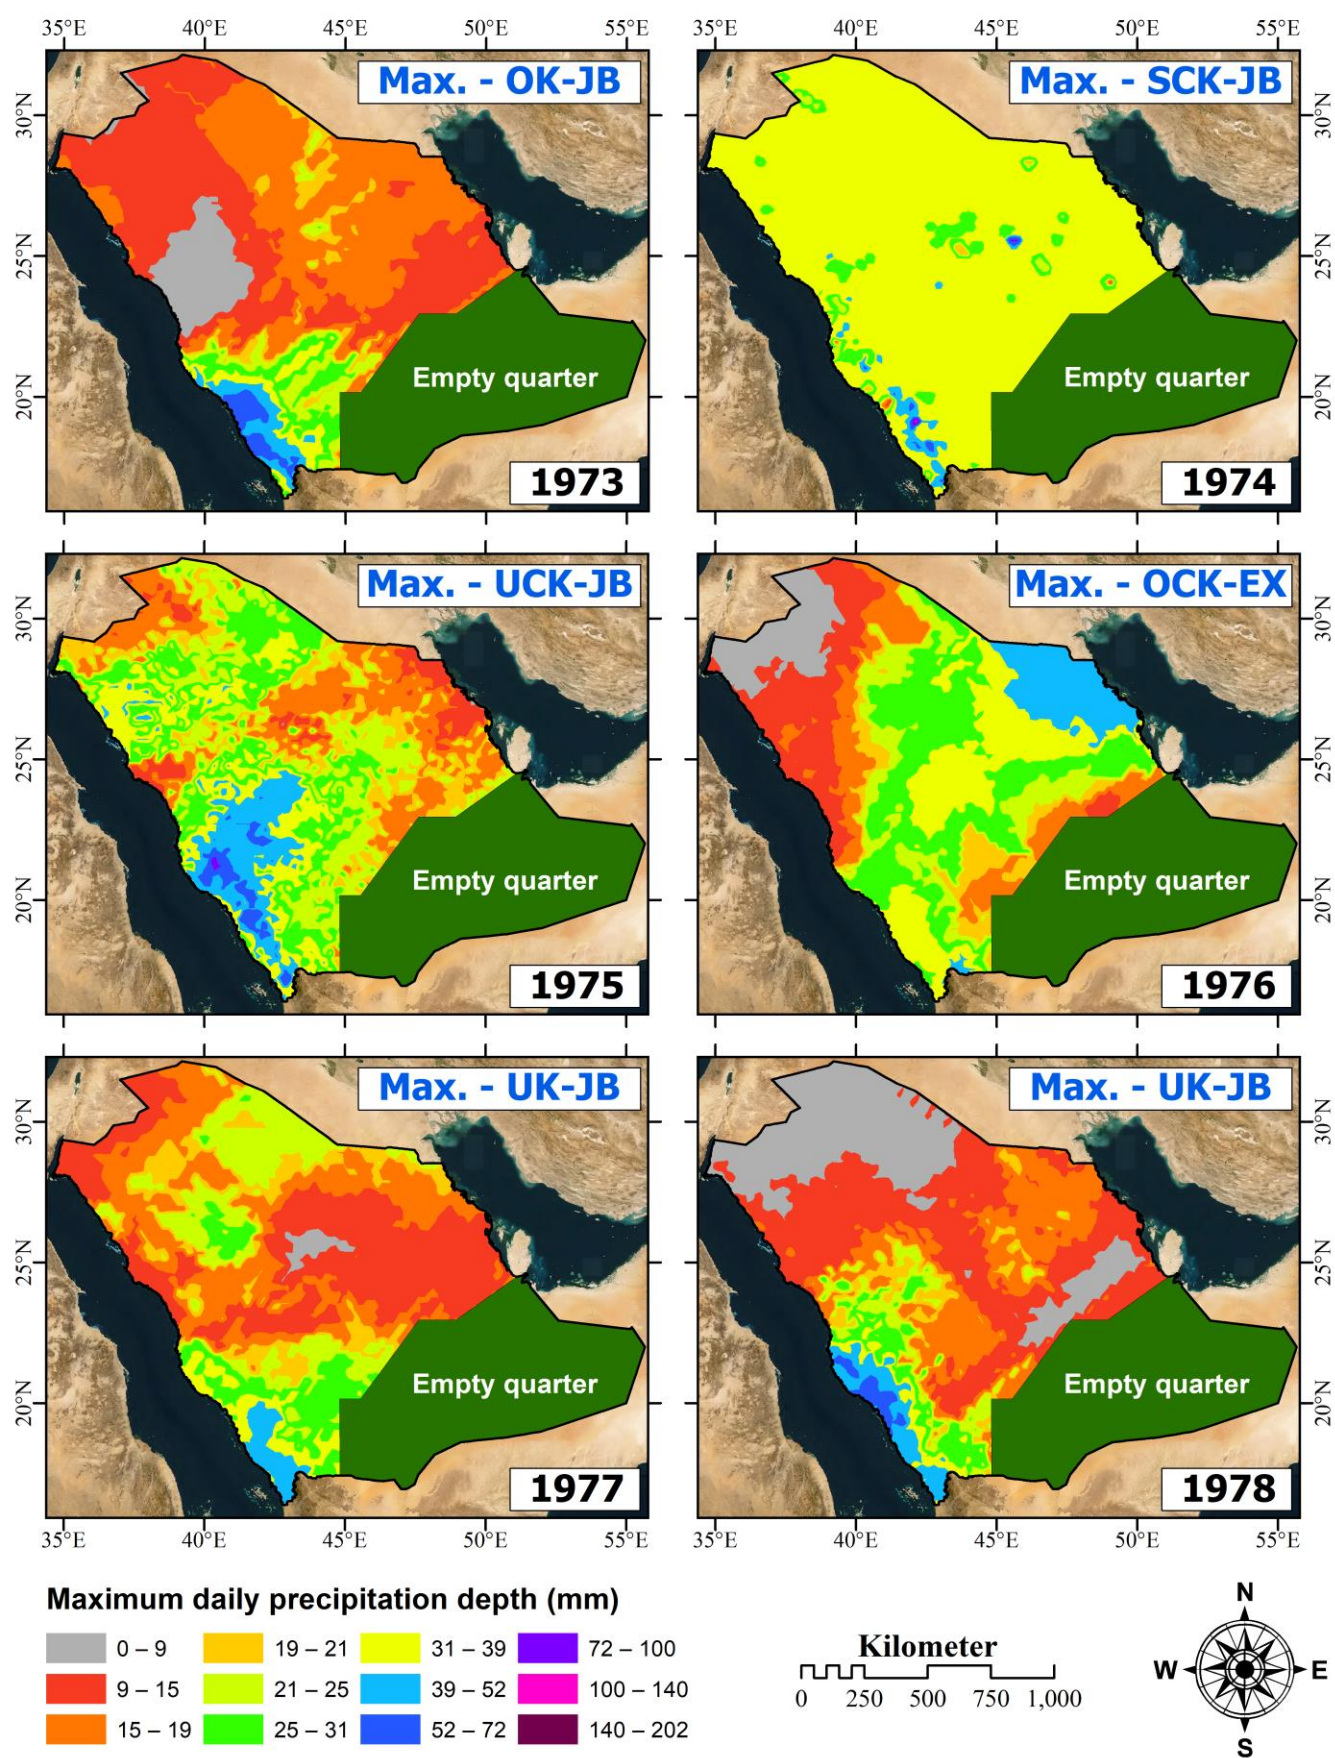

Figure S2. Spatial distribution of maximum daily precipitation depth from (1973–1978).



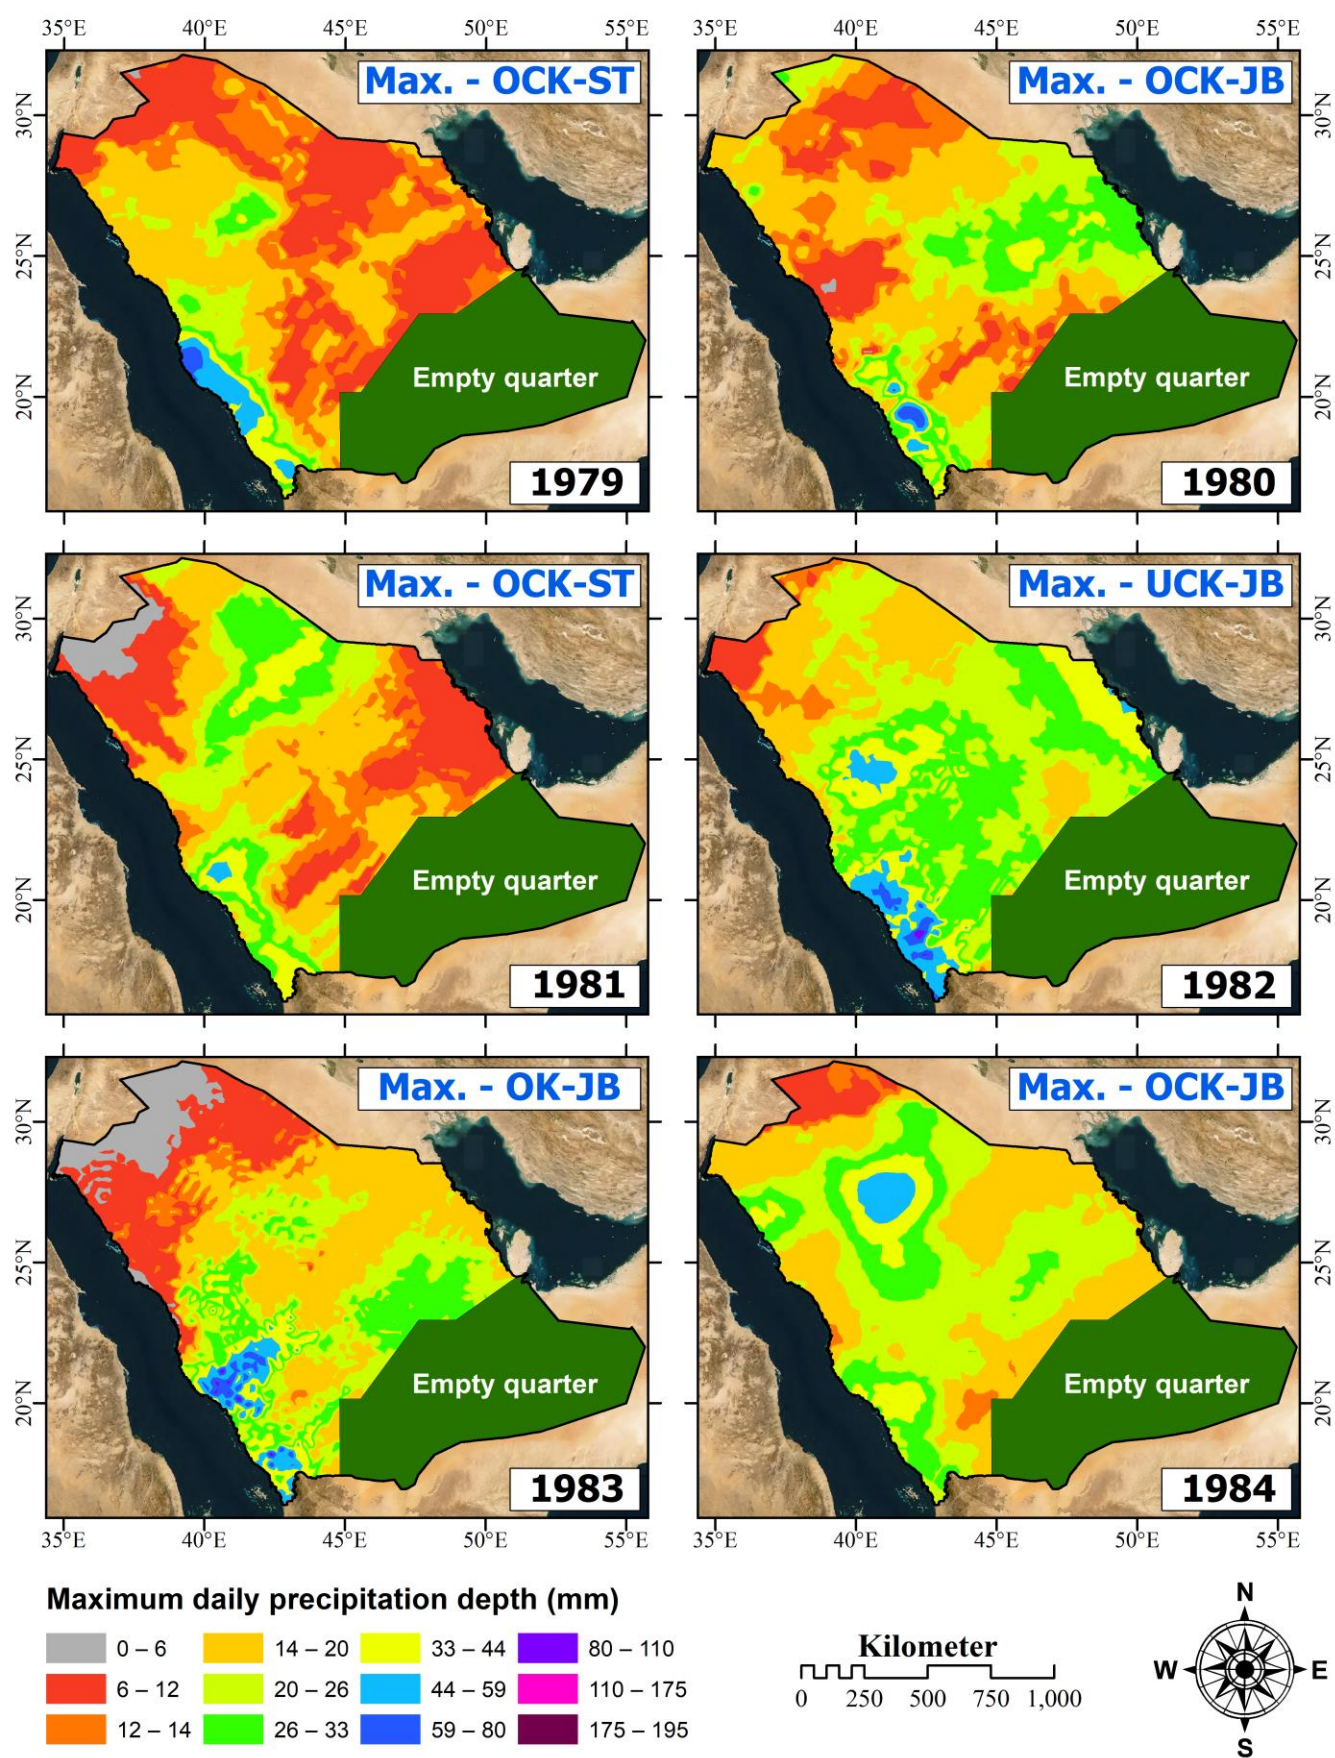



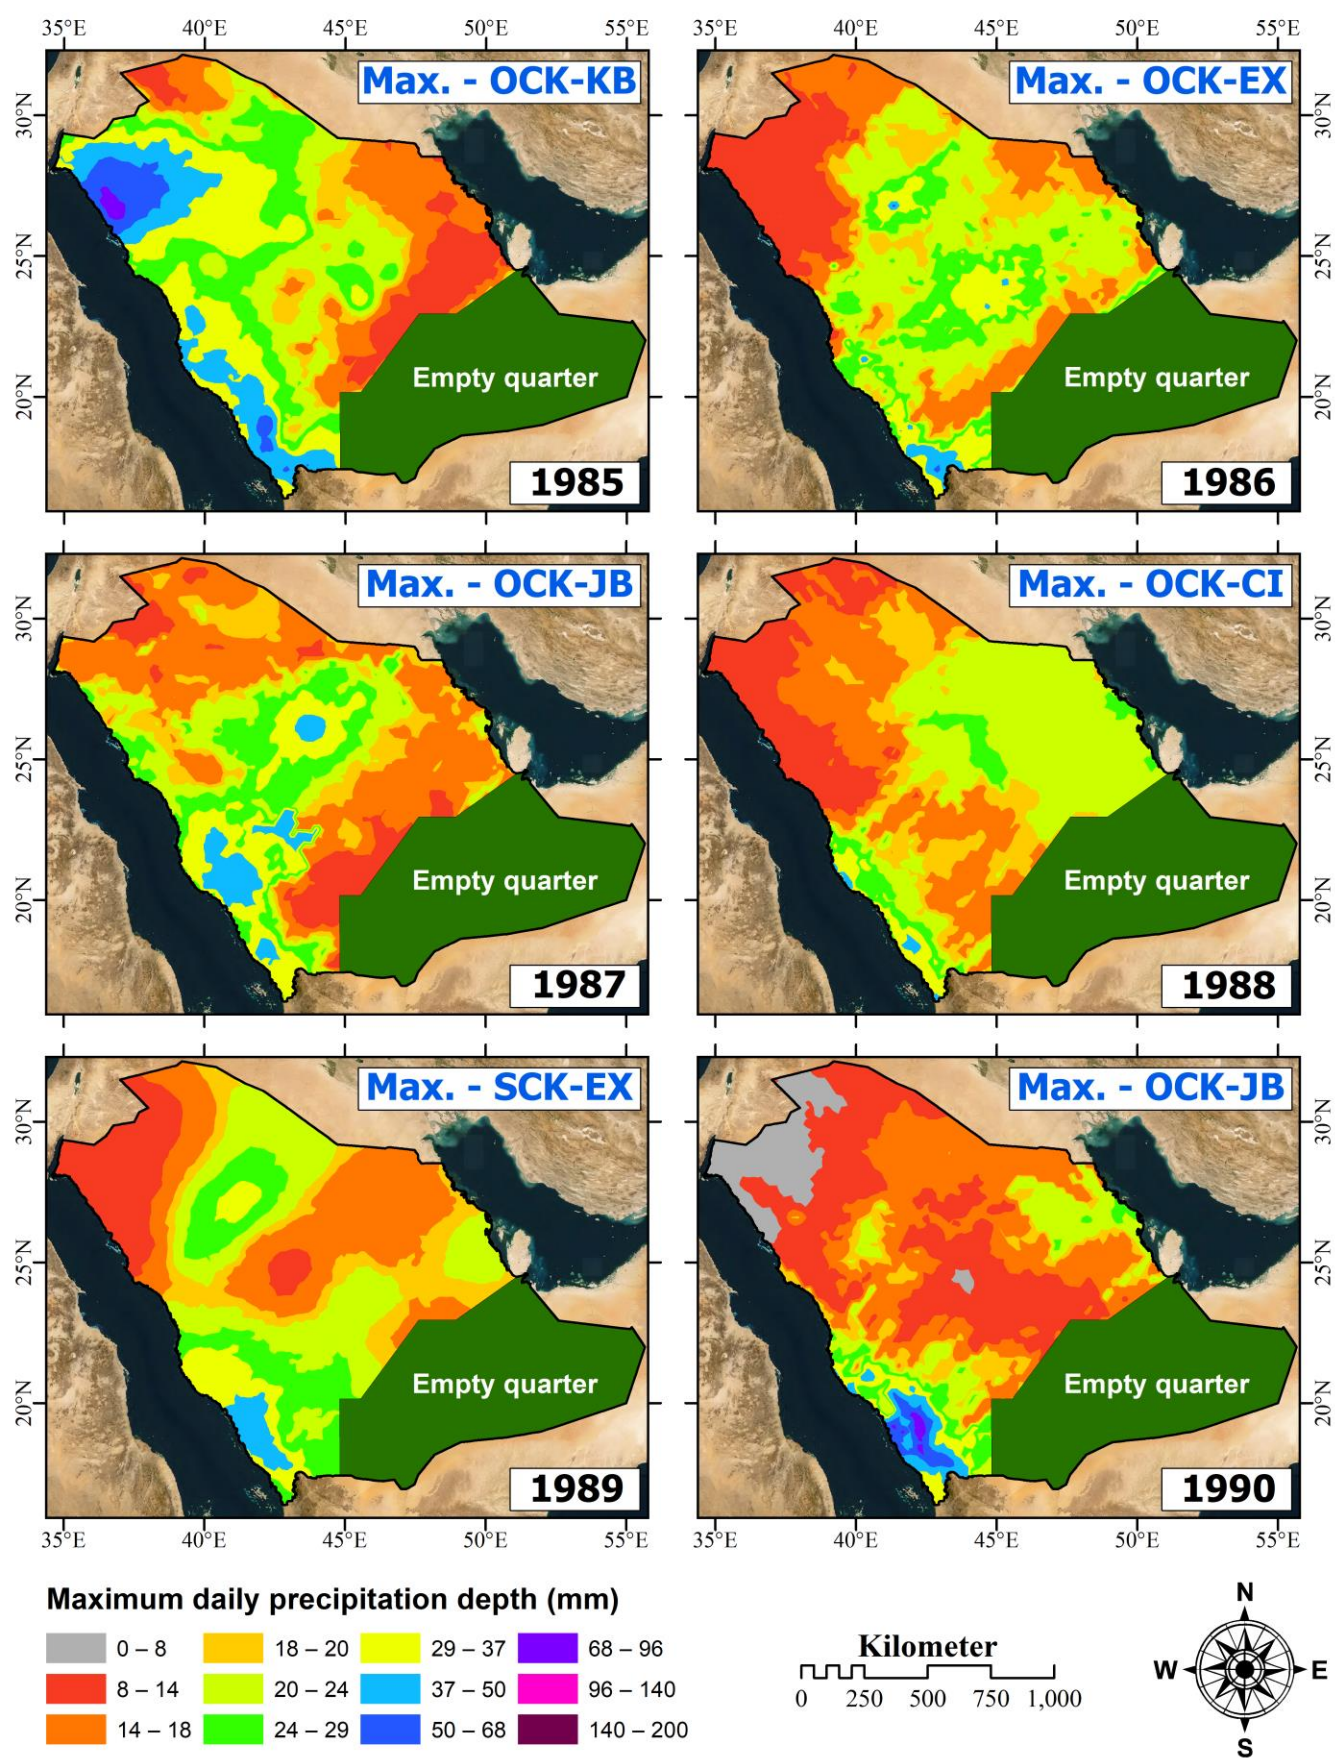

Figure S4. Spatial distribution of maximum daily precipitation depth from (1985-1990).



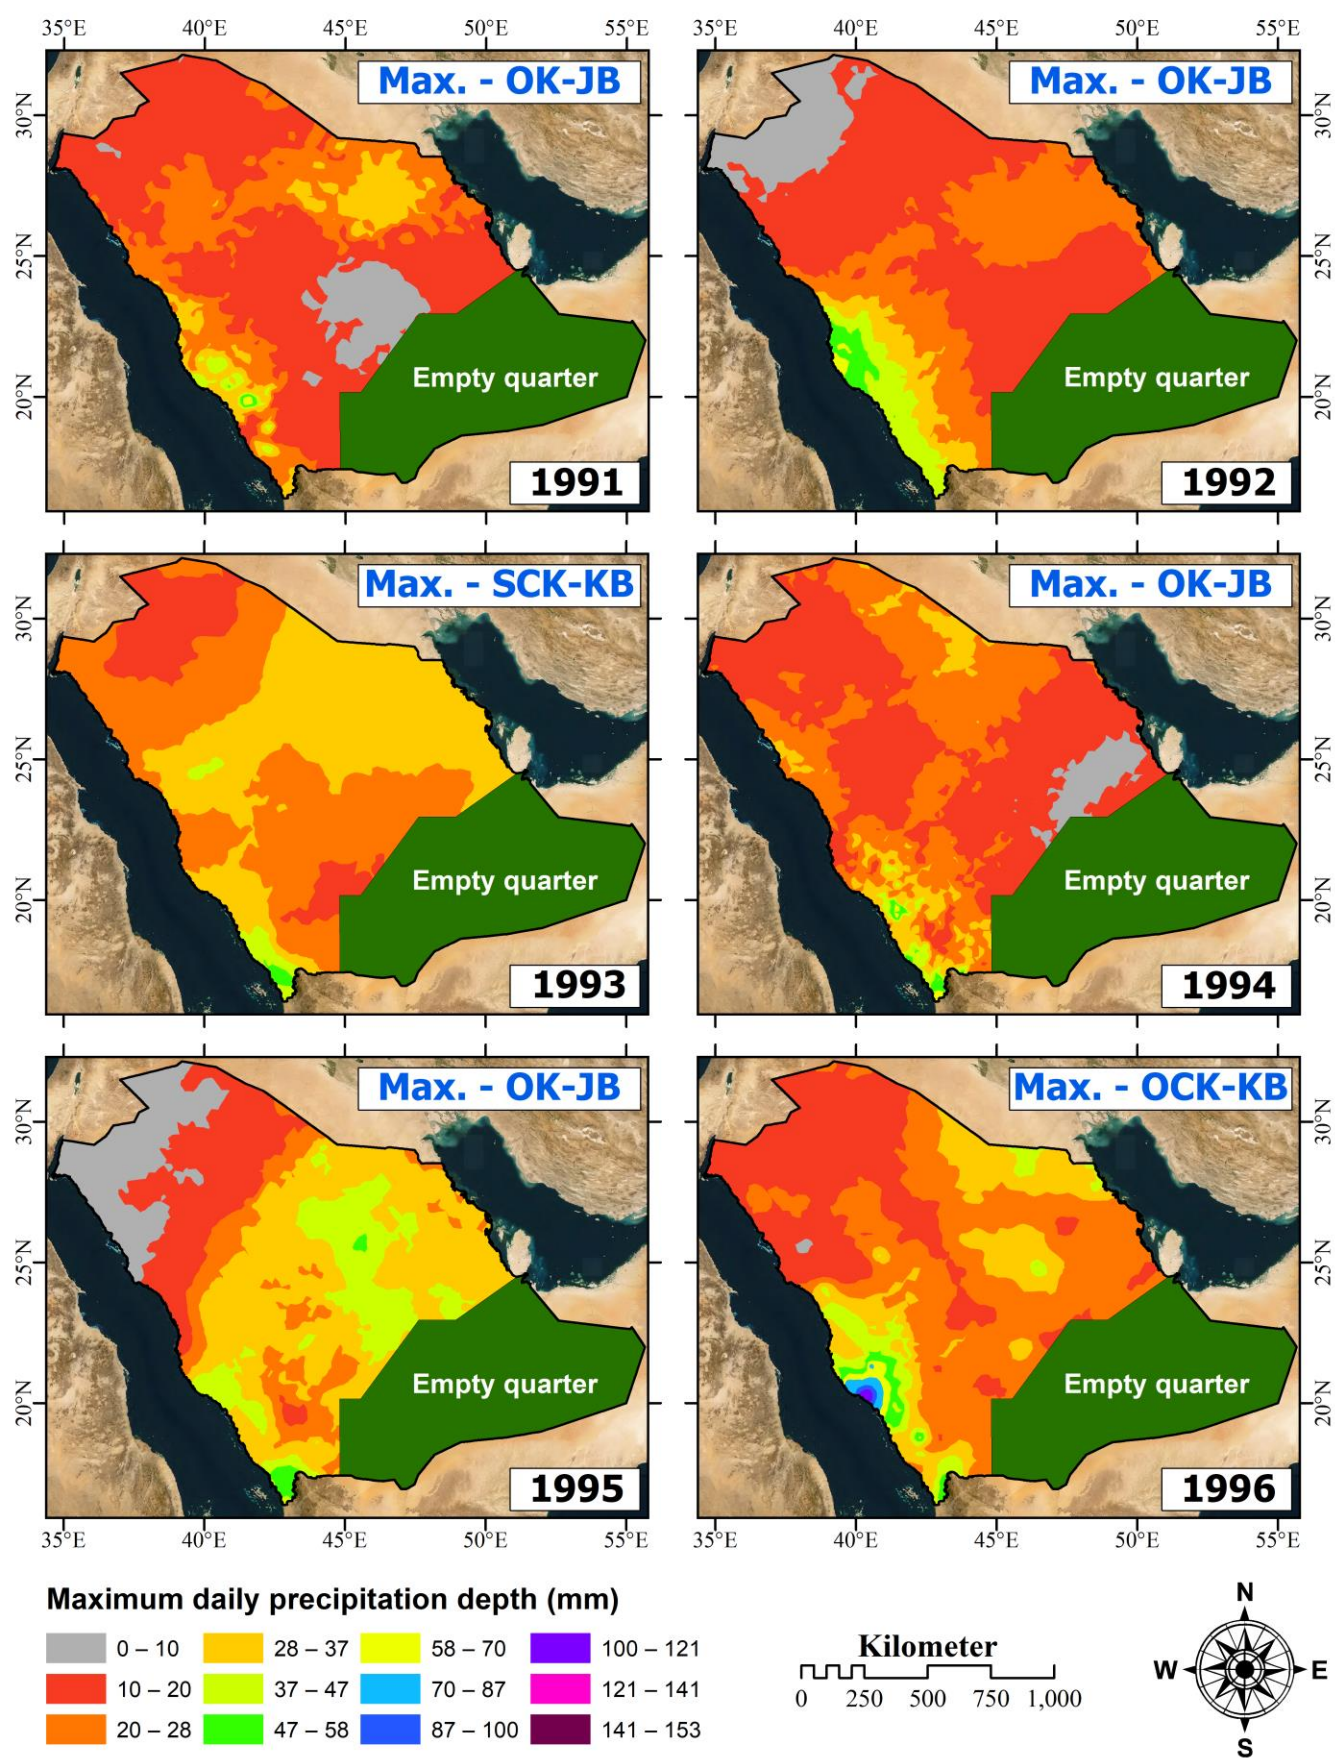

Figure S5. Spatial distribution of maximum daily precipitation depth from (1991-1996).



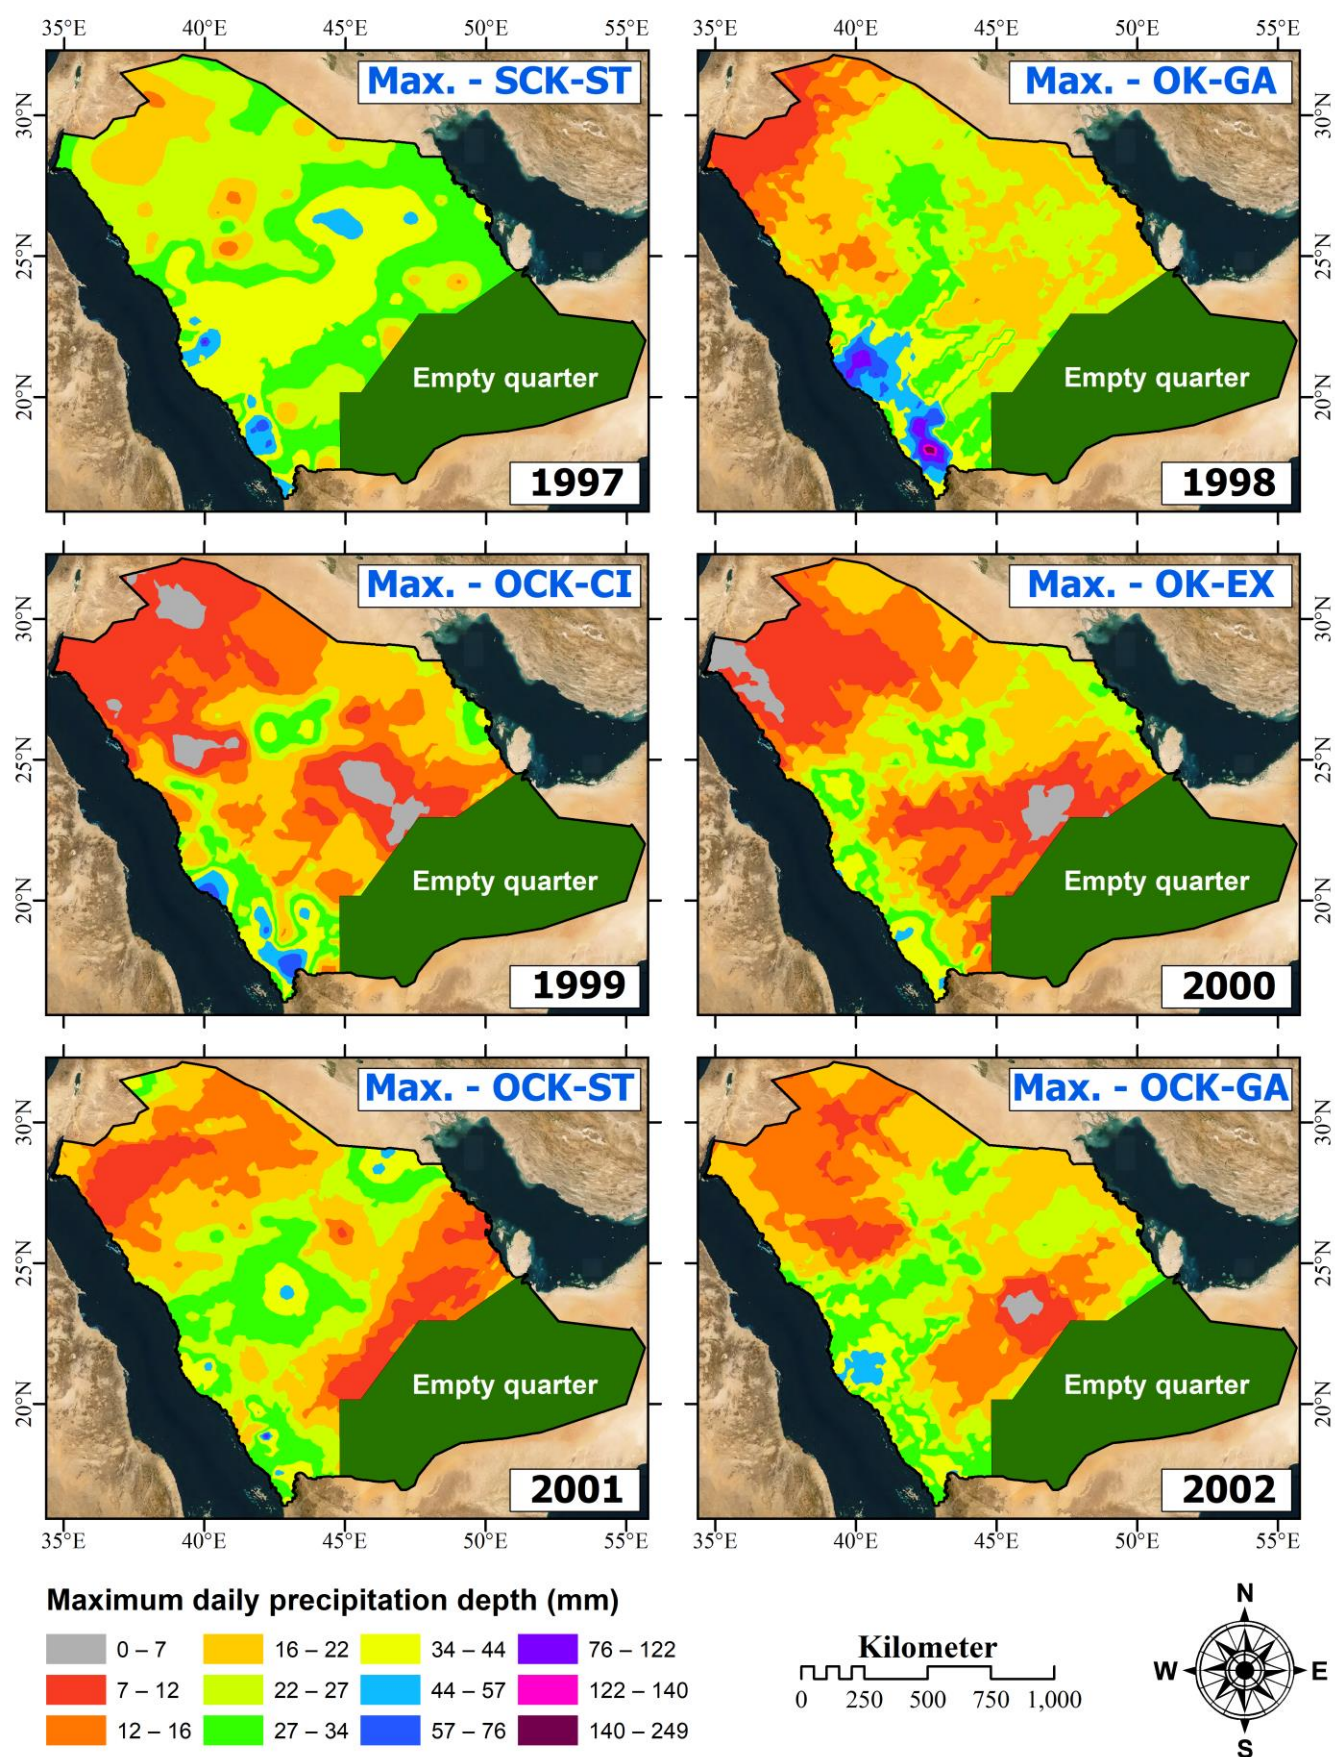



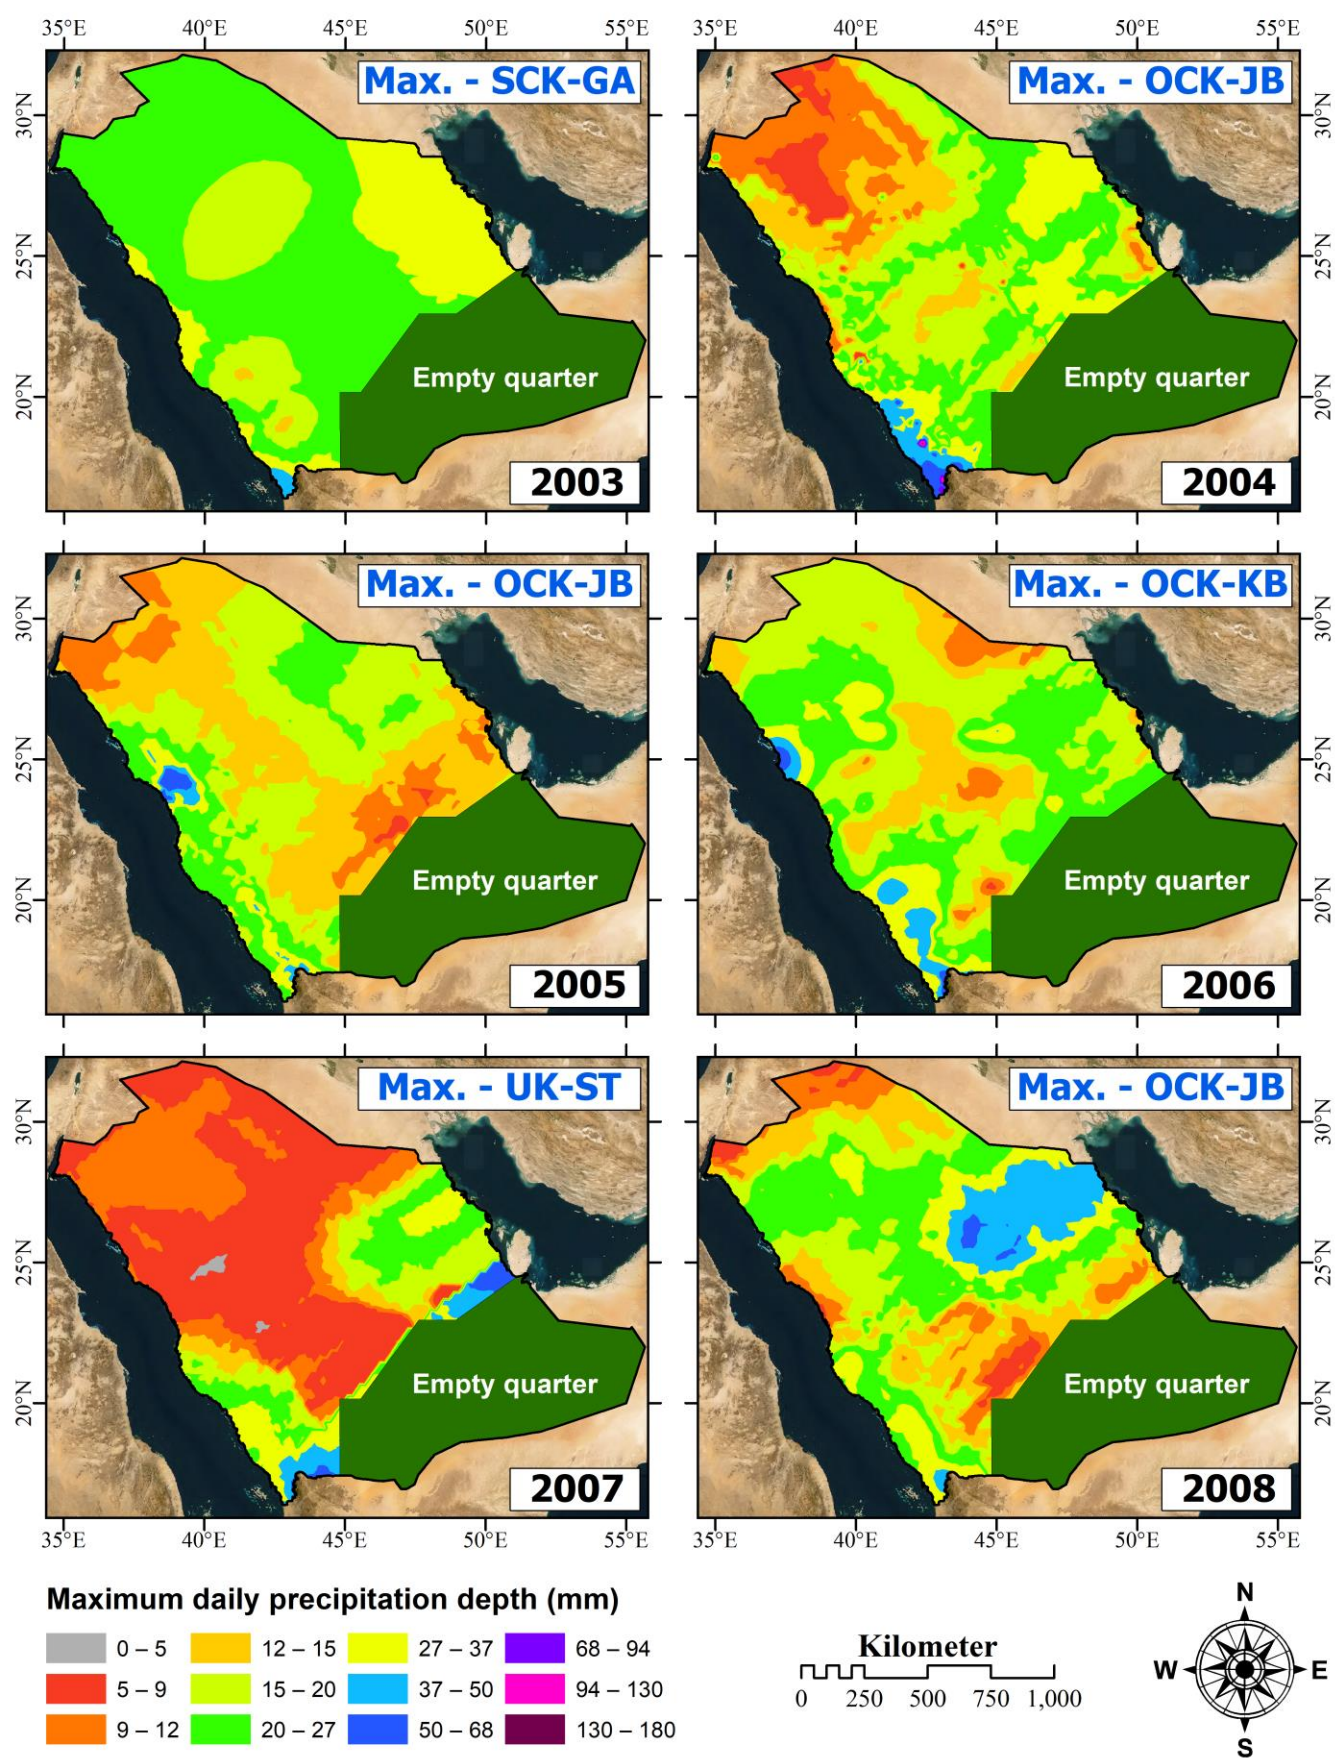



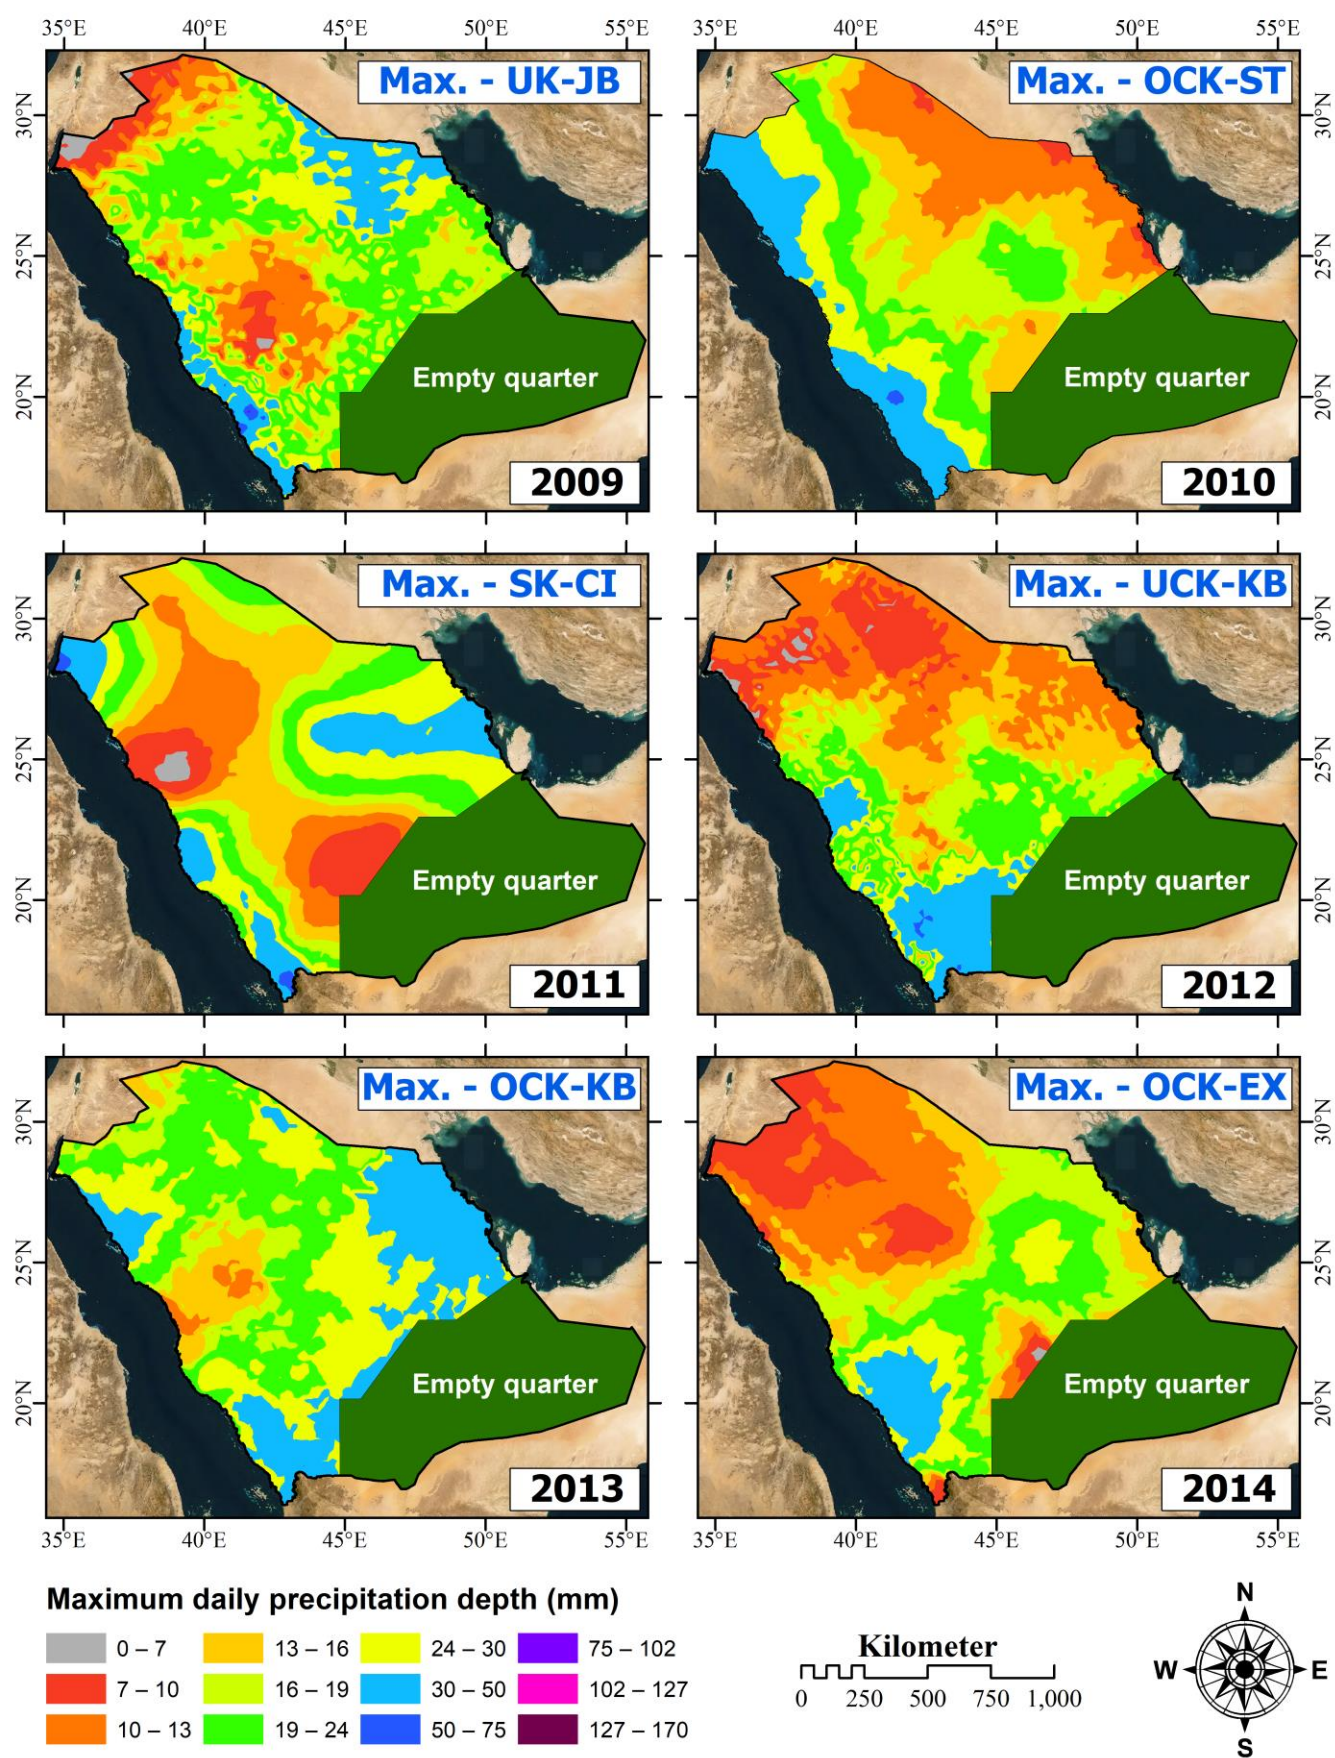

Figure S8. Spatial distribution of maximum daily precipitation depth from (2009–2014).



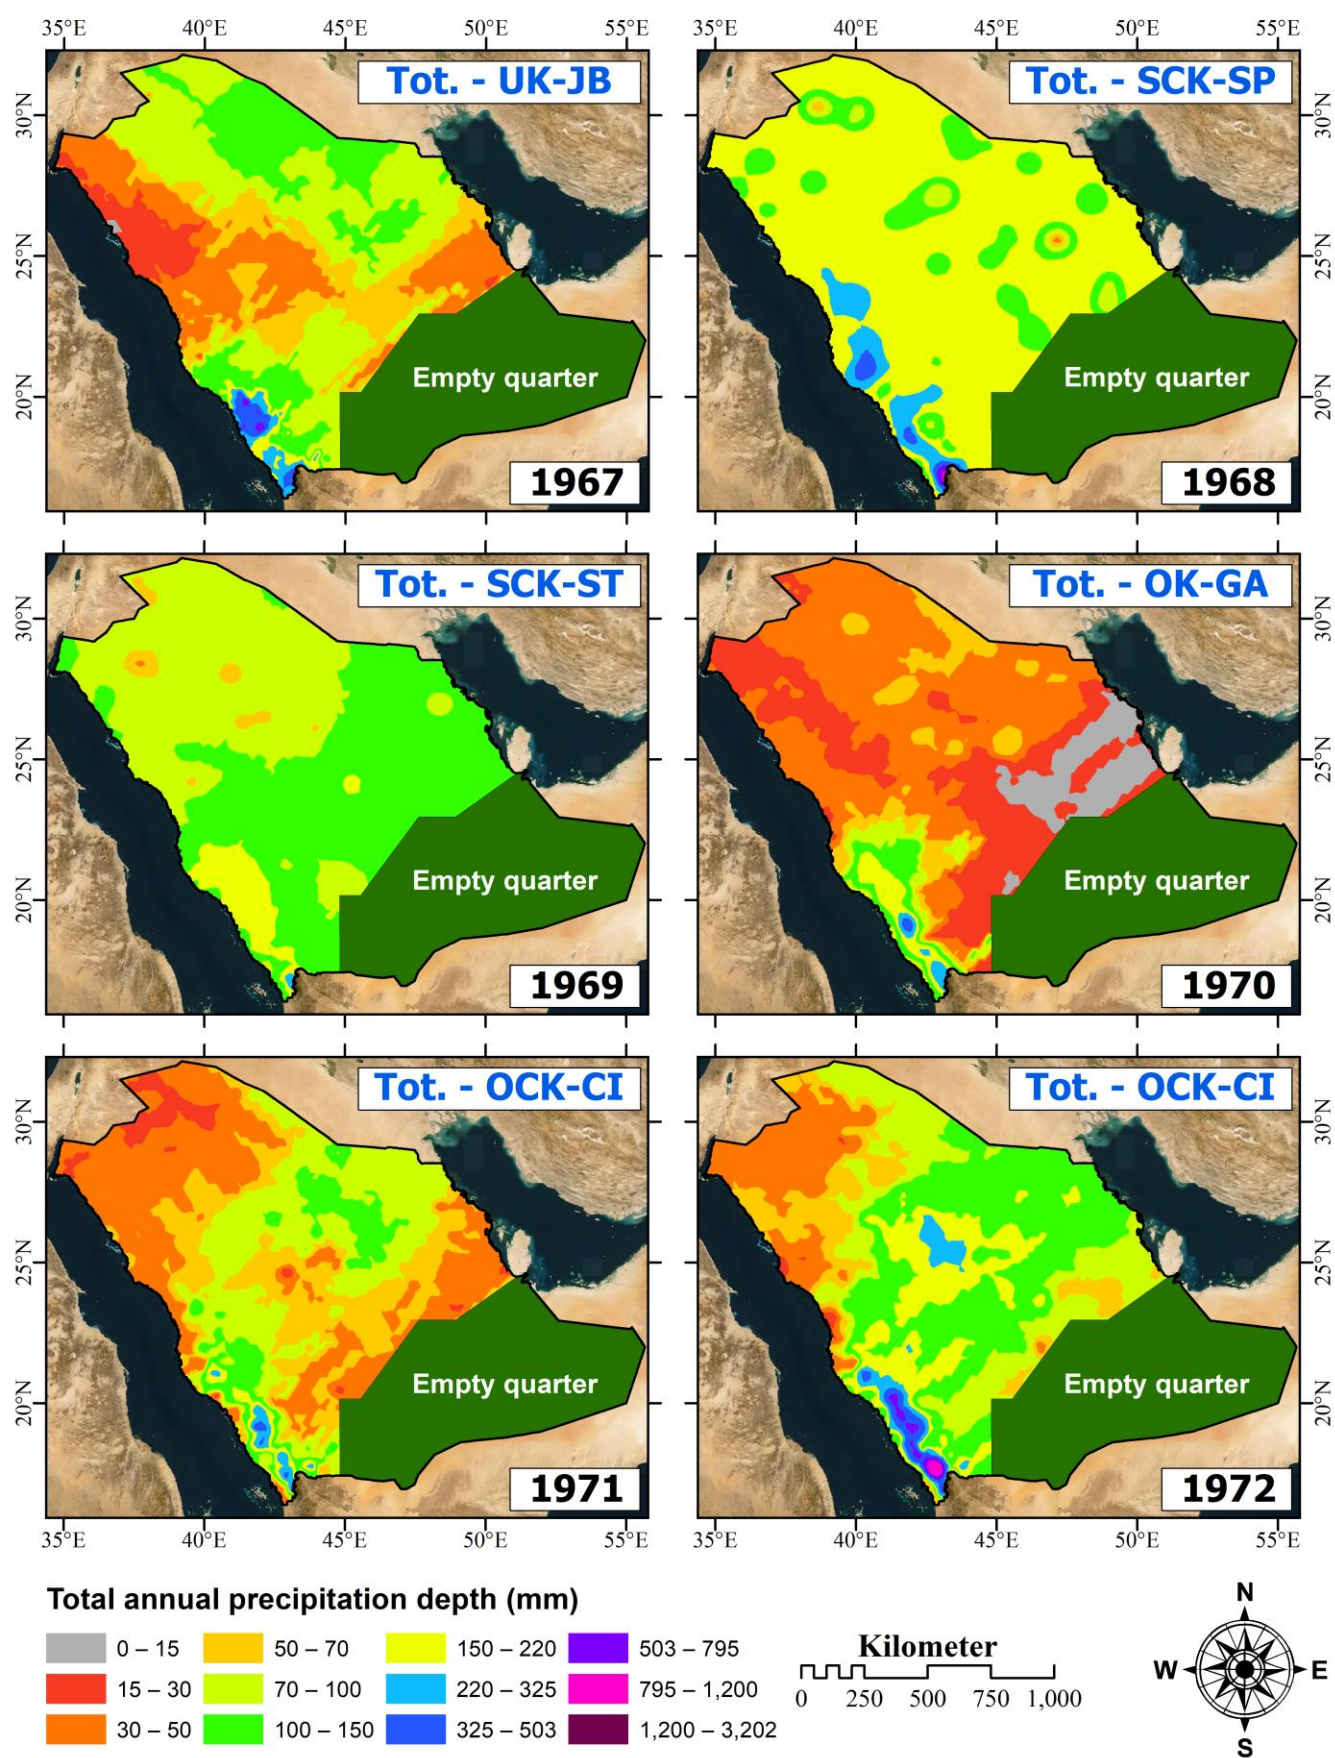



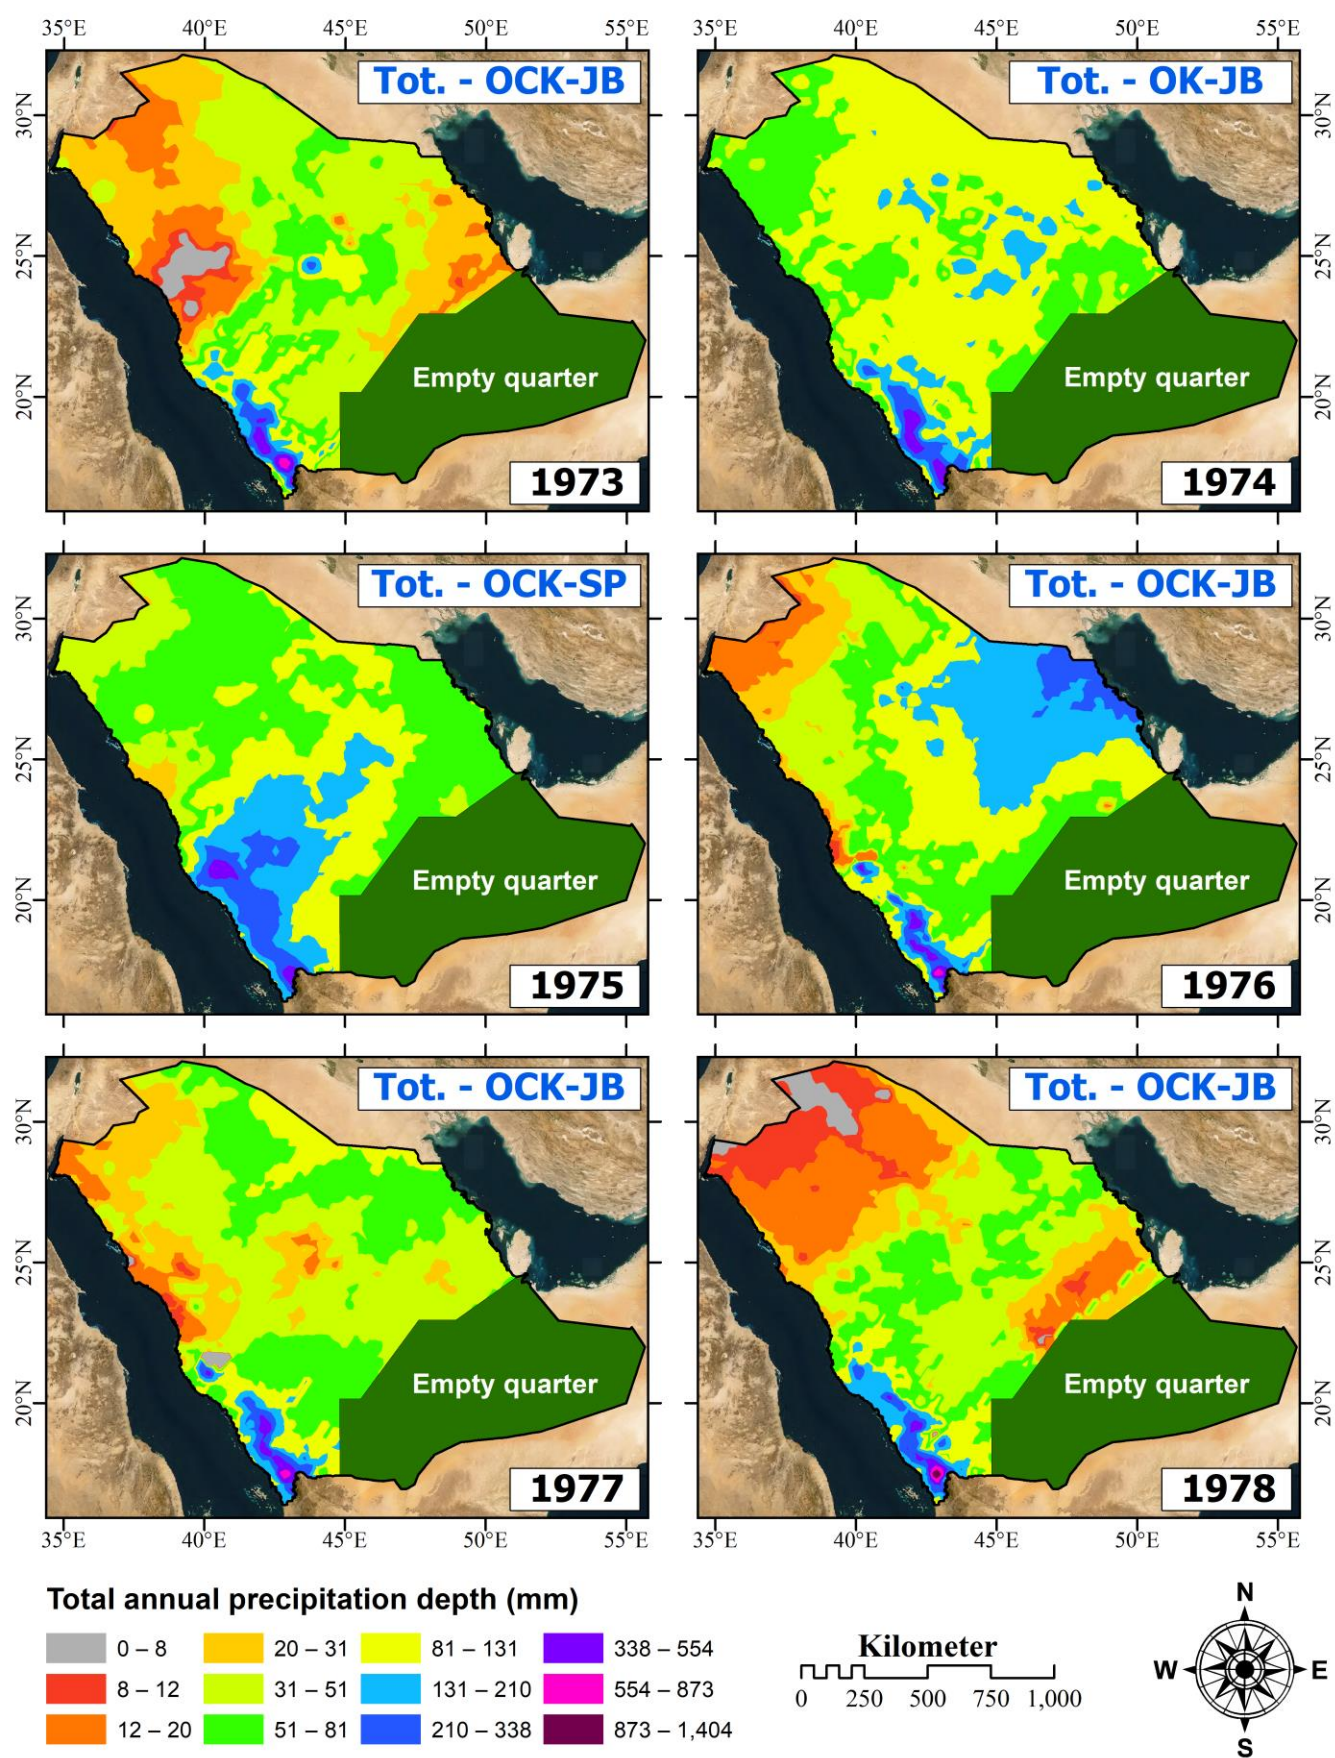



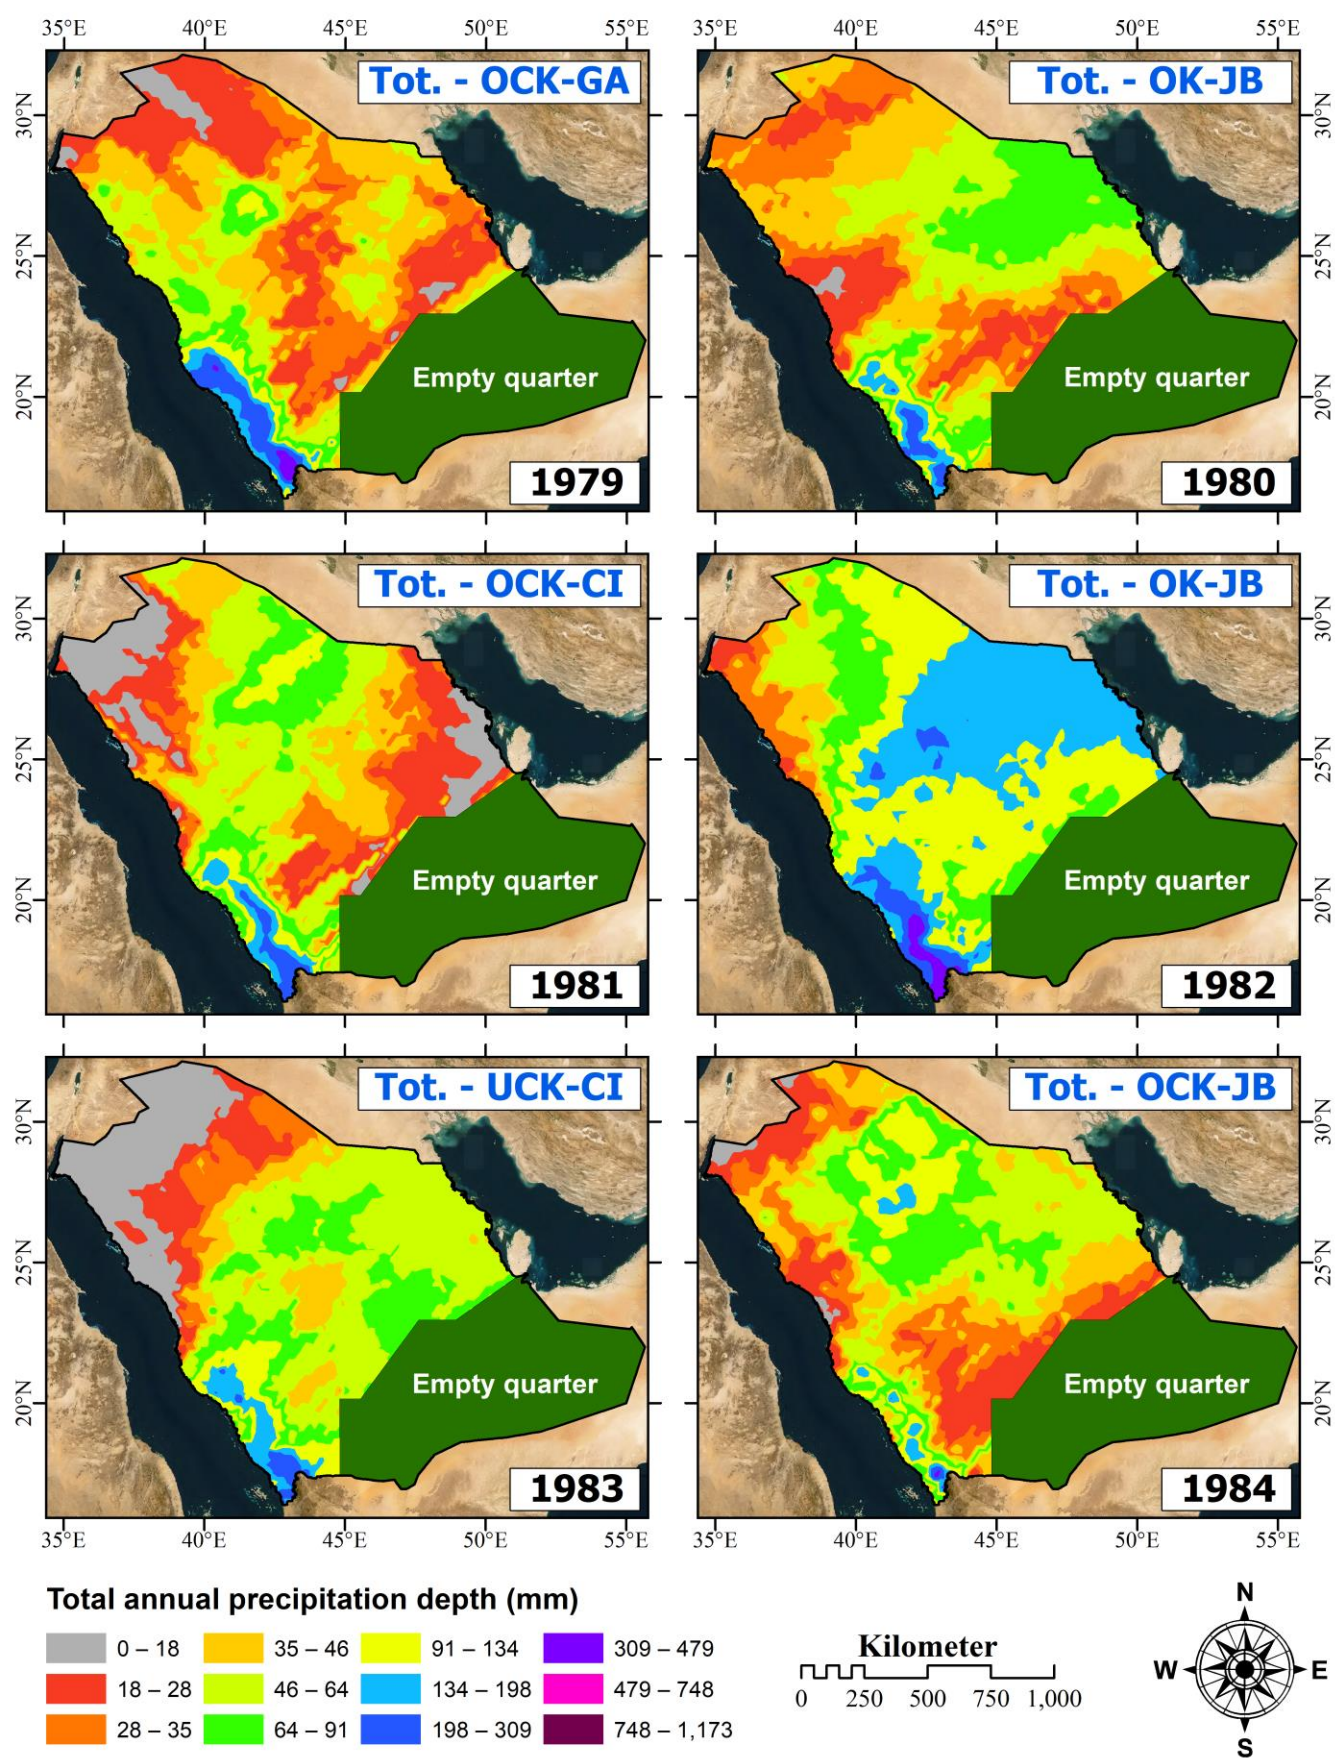



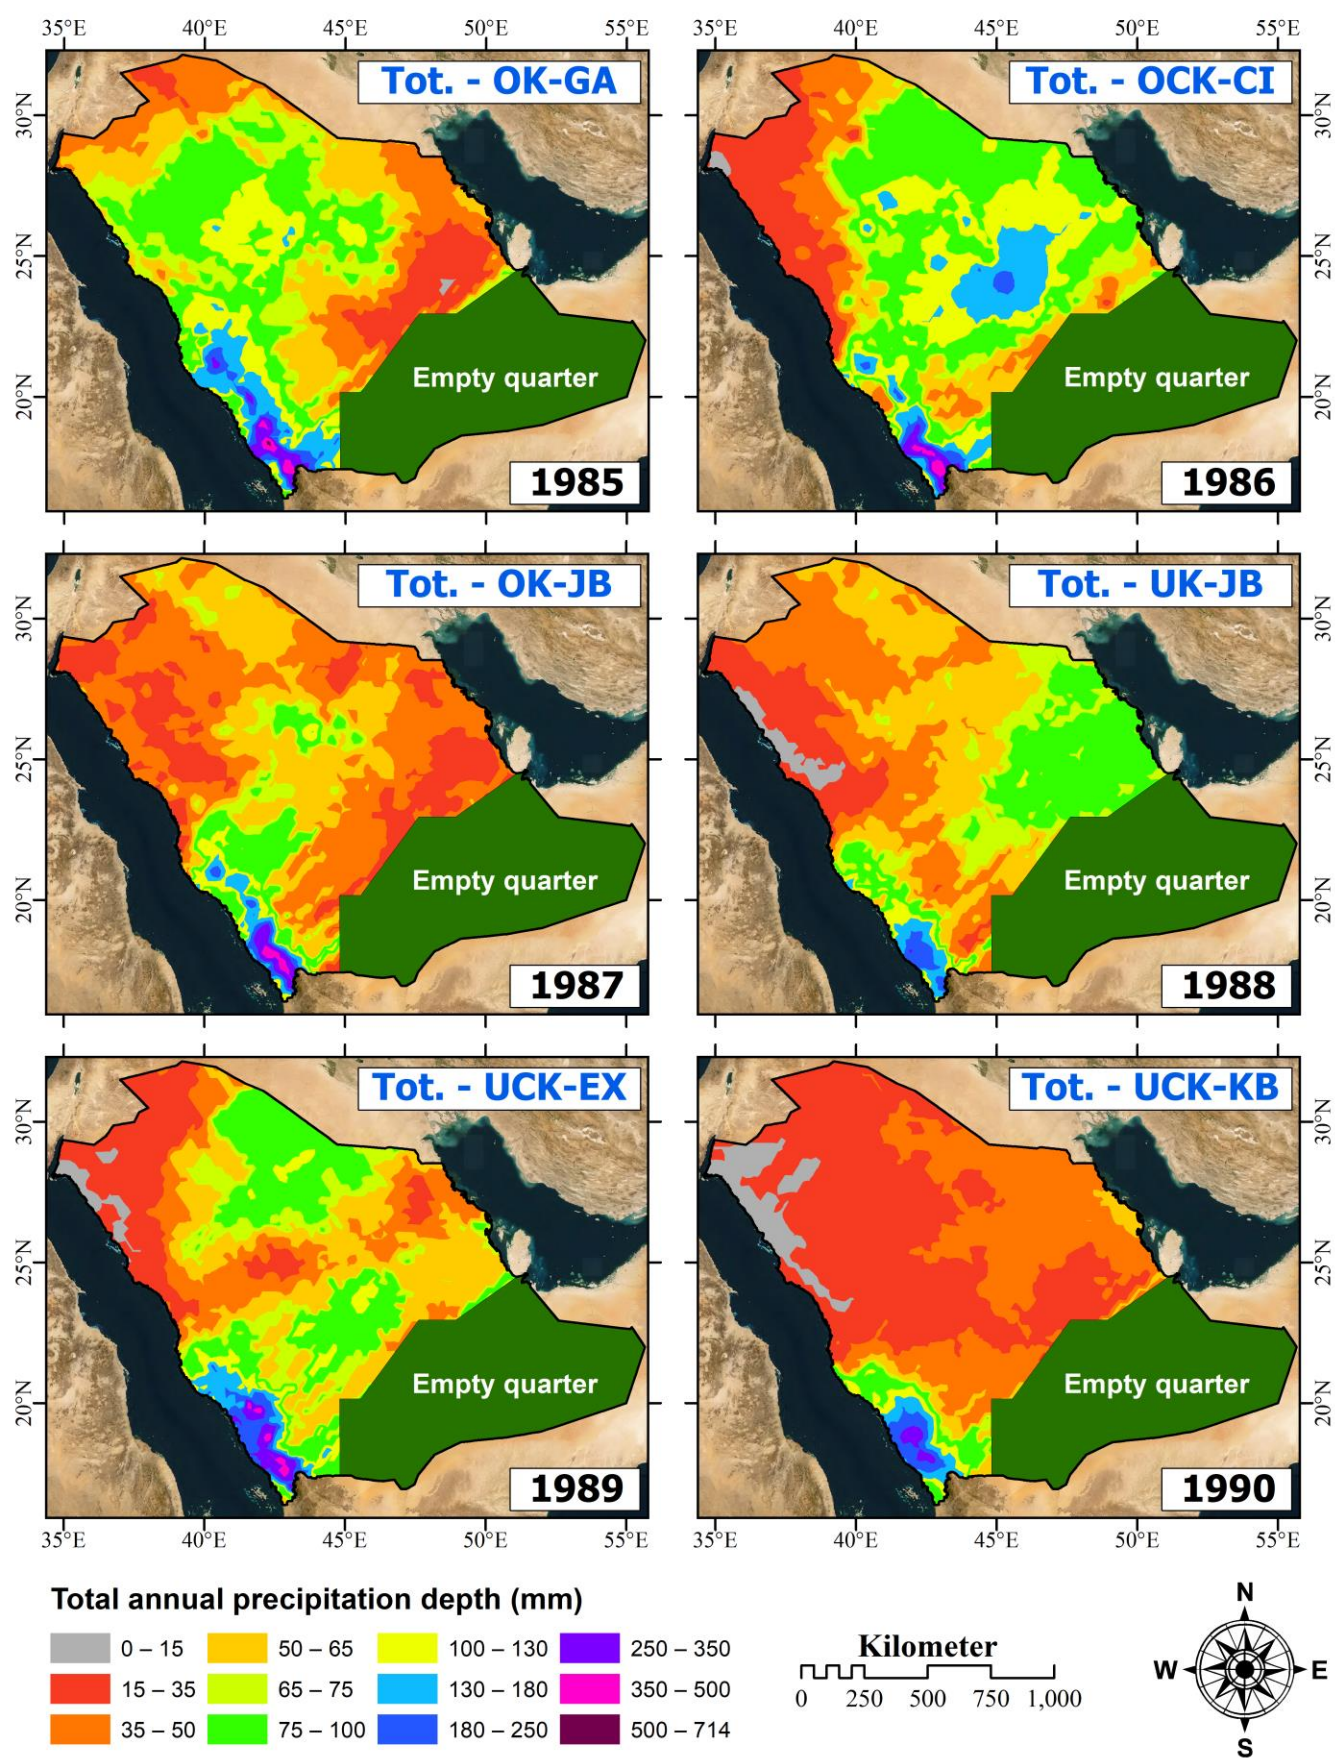



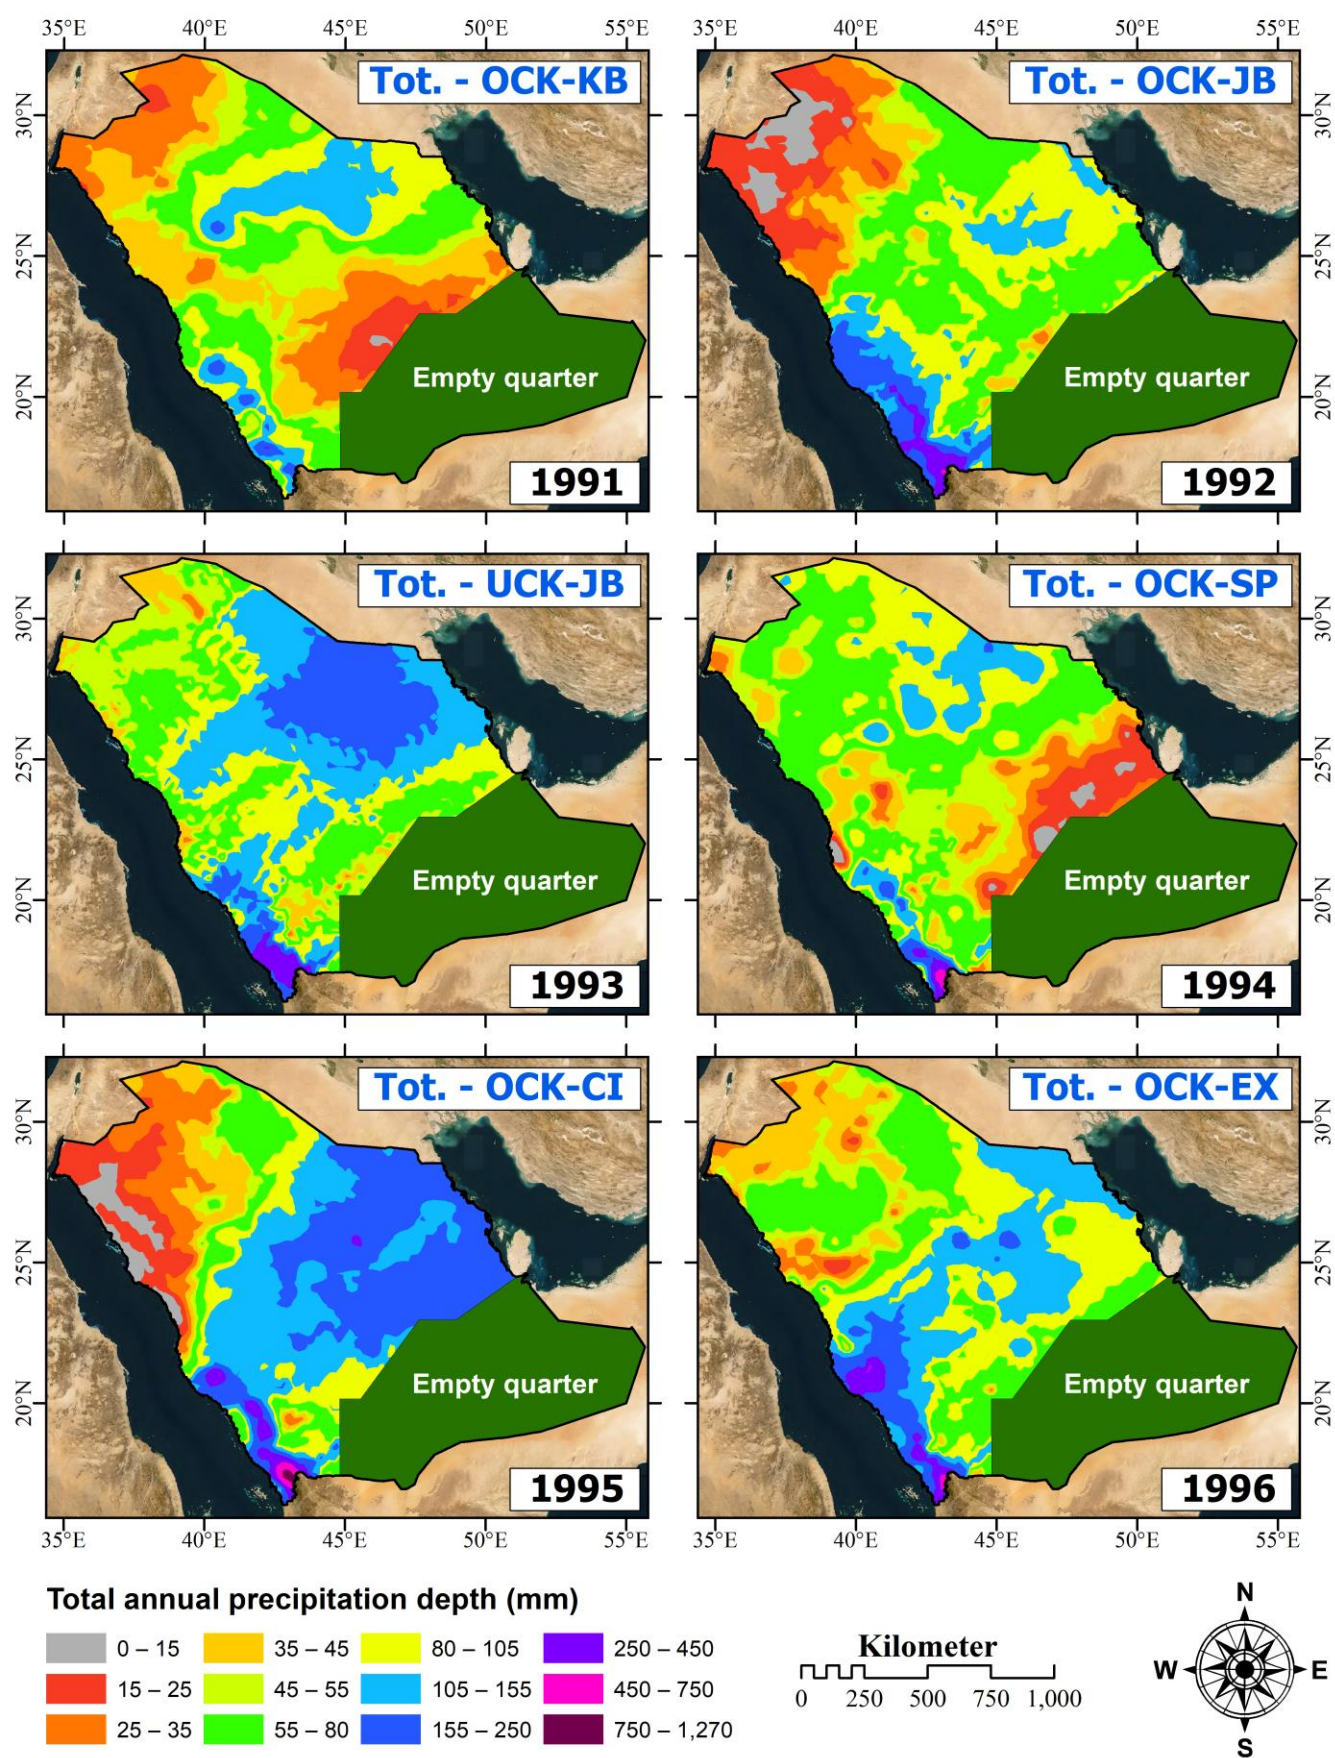



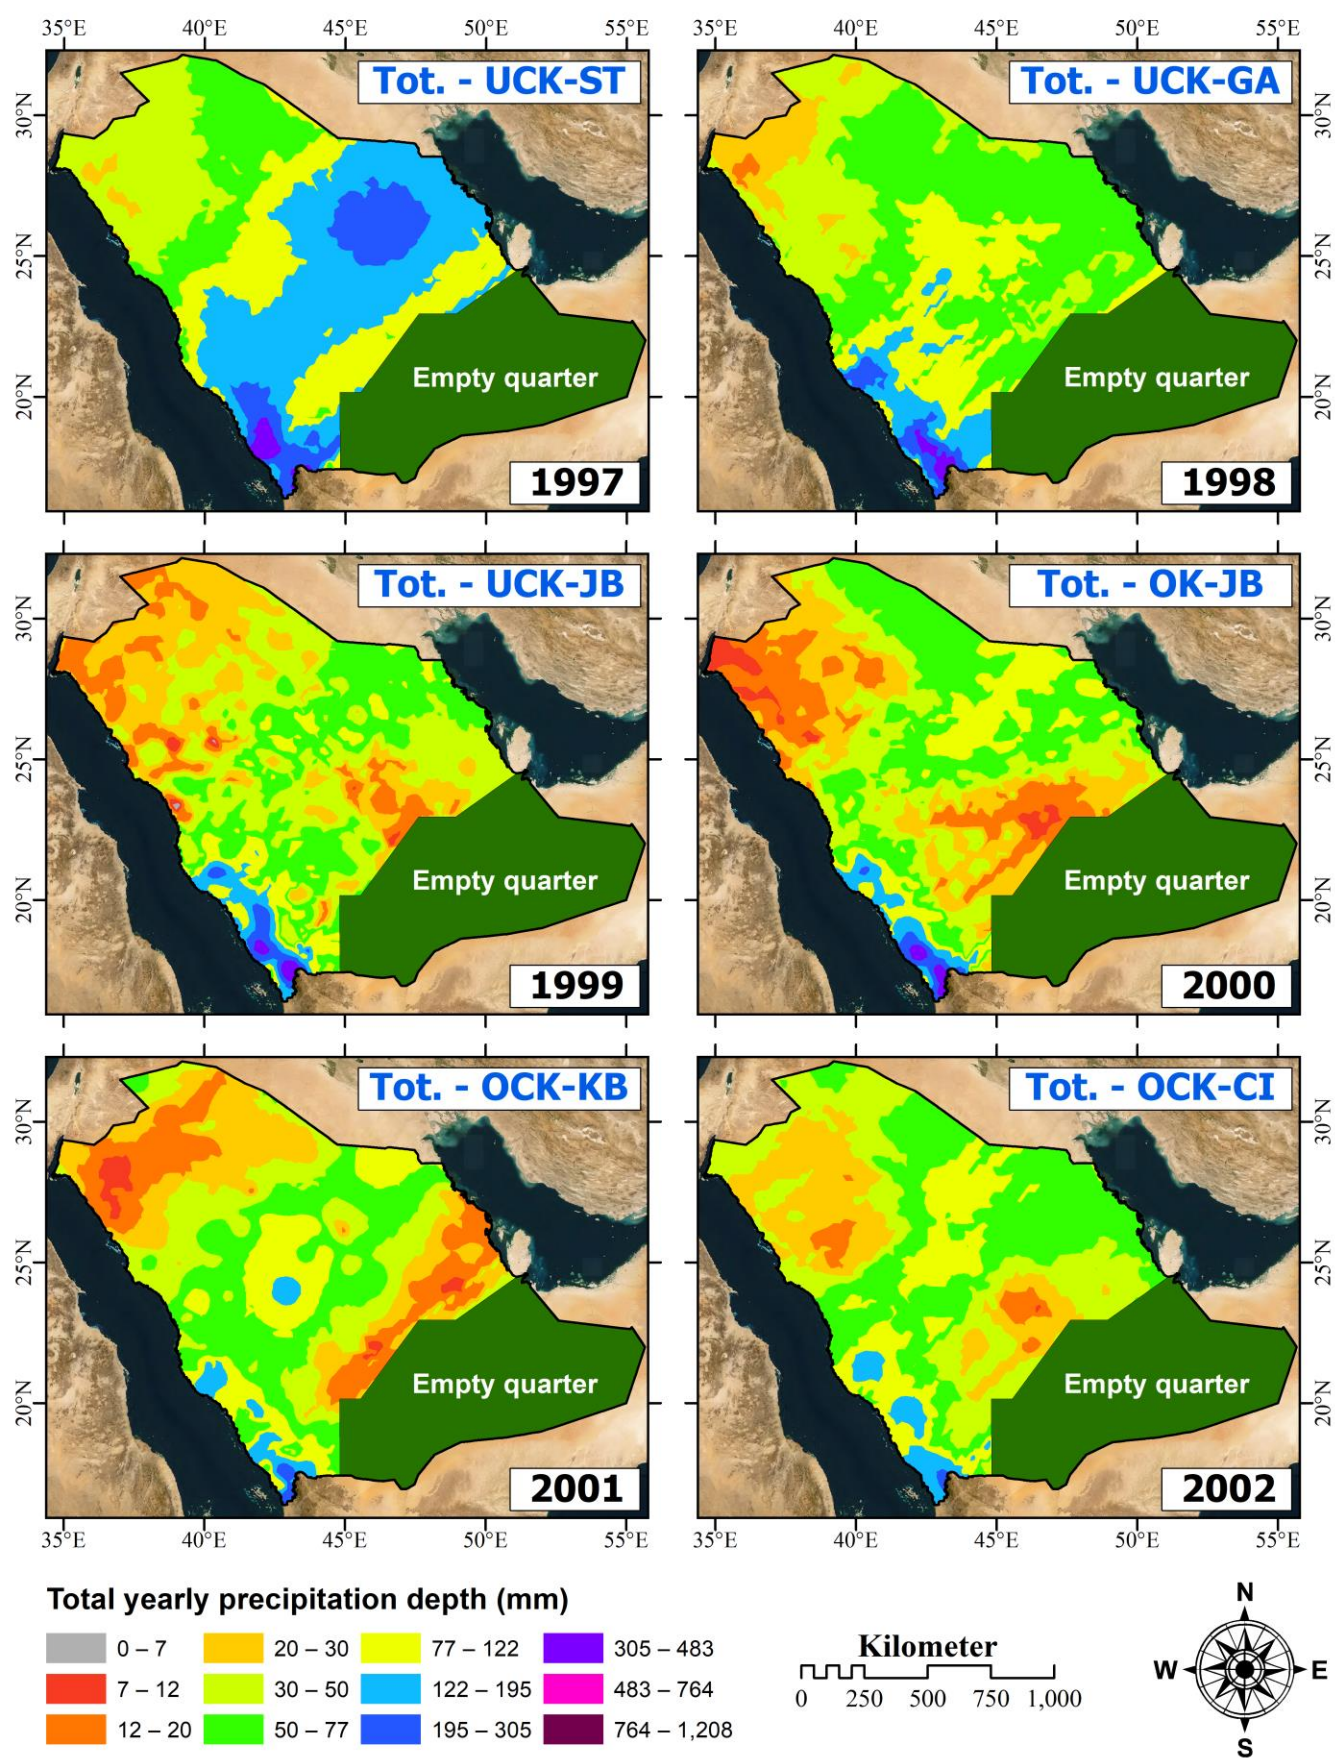



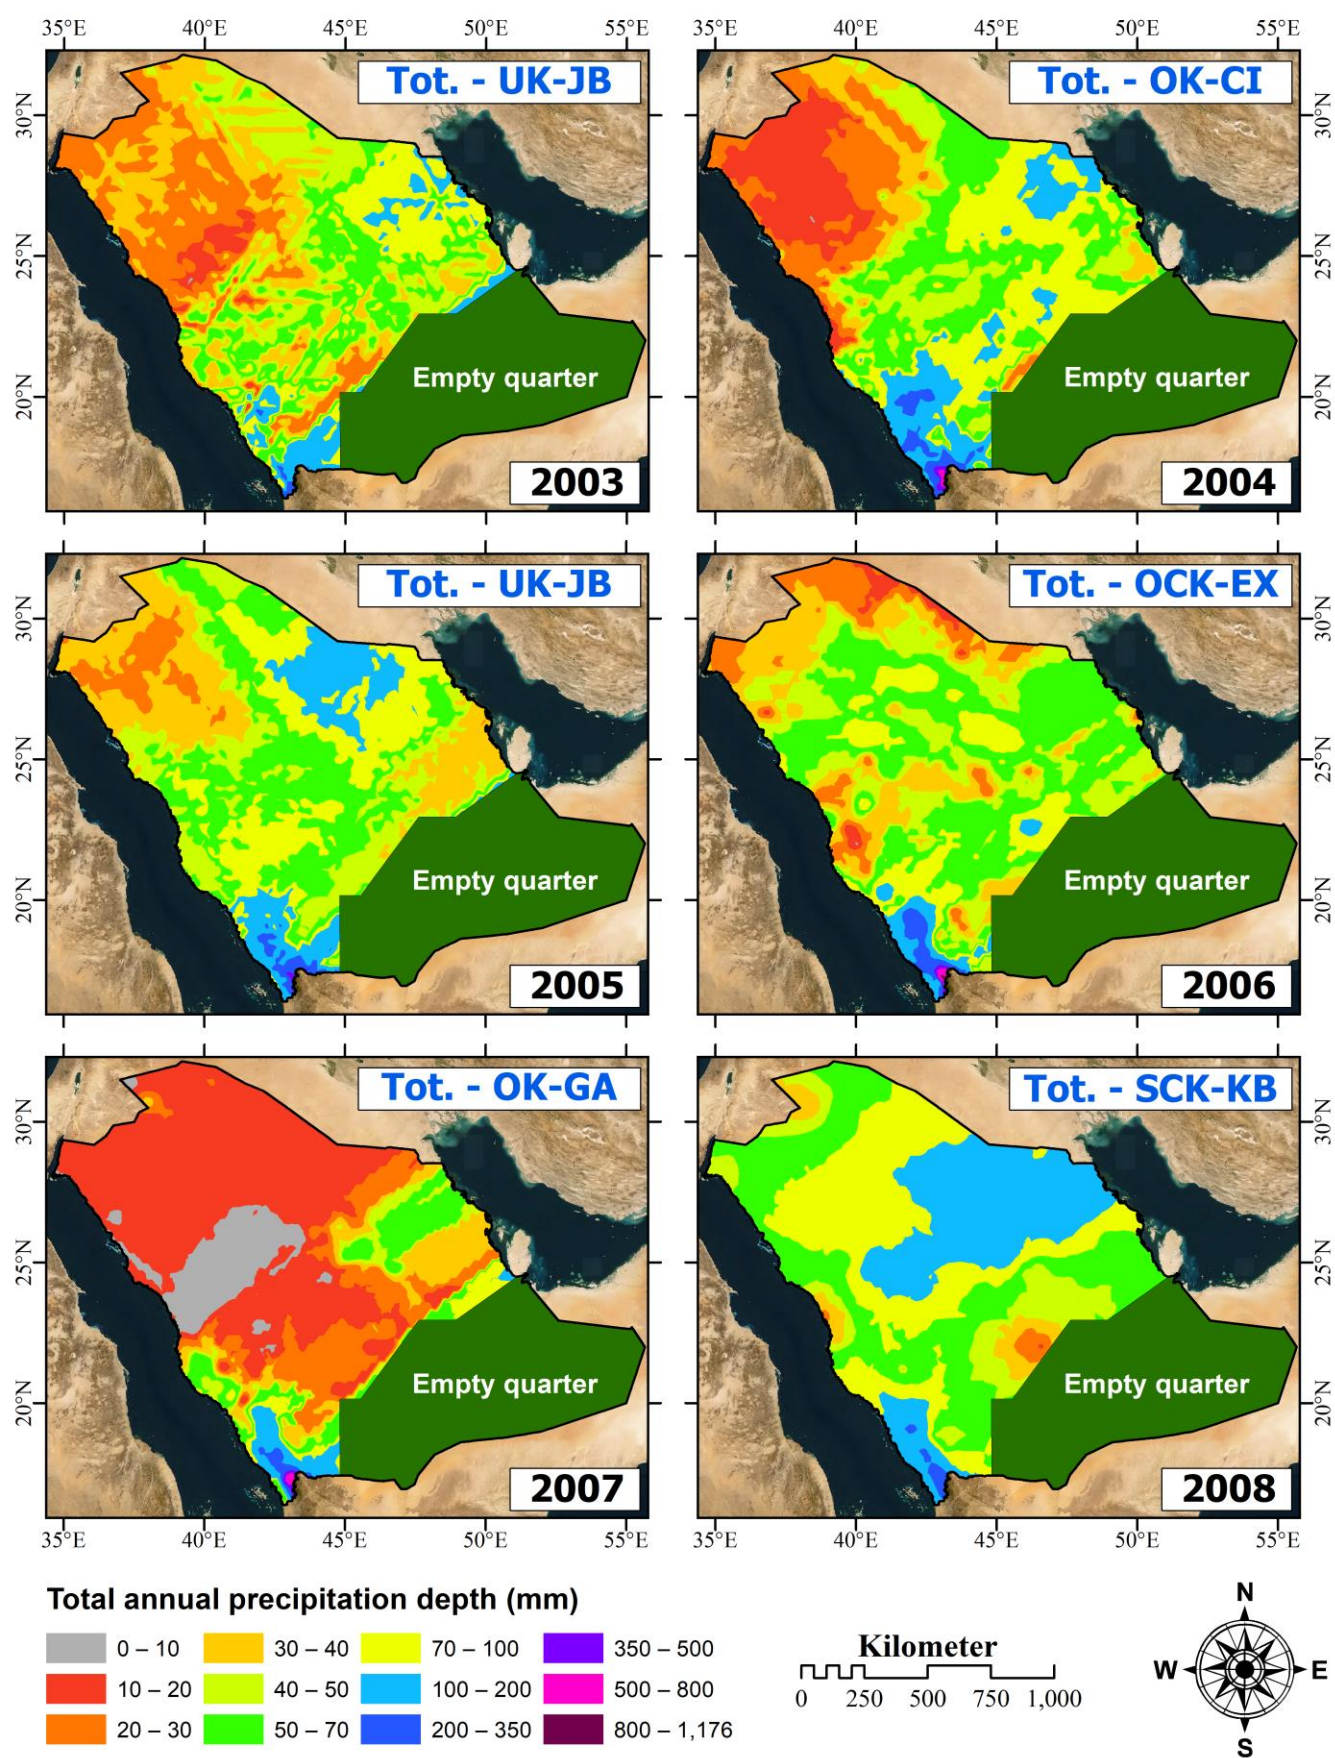



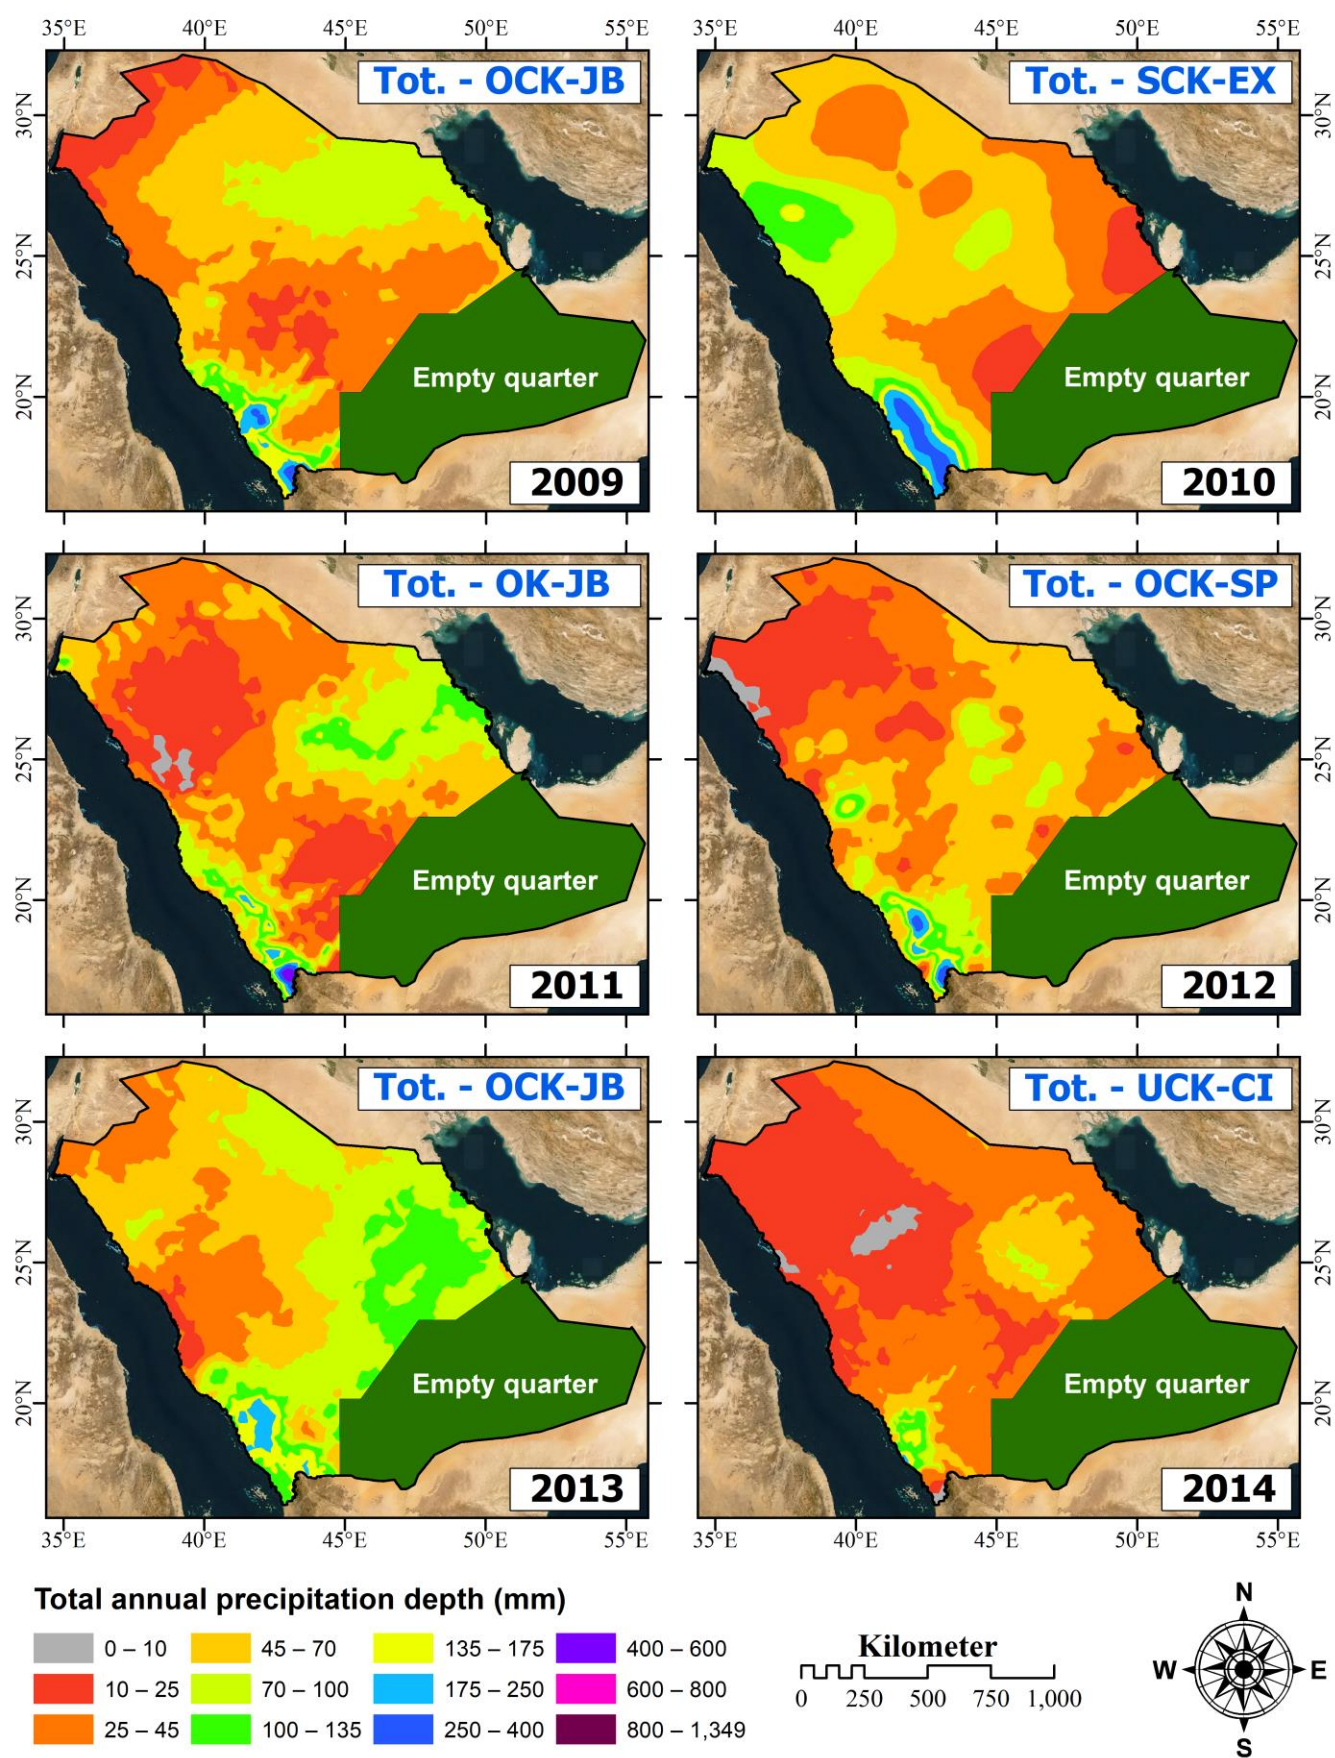

Supplement: s1 [file s1]
